# Supplementary material for: Effect of ω-3 fatty acid supplementation on endothelial function, endogenous fibrinolysis and platelet activation in patients with a previous myocardial infarction: a randomised controlled trial
Source: PubMed Central journal article supplement — BMJ Open. 2013 Sep 25;3(9):e003054. doi: 10.1136/bmjopen-2013-003054 (PMC3787492; doi:10.1136/bmjopen-2013-003054), 2013-09-25
Supplement: bmjopen-2013-003054.draft_revisions.pdf [file bmjopen-2013-003054.draft_revisions.pdf]

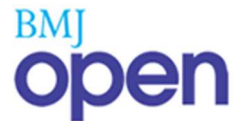

**EFFECT OF OMEGA 3 FATTY ACID SUPPLEMENTATION ON  
ENDOTHELIAL FUNCTION, ENDOGENOUS FIBRINOLYSIS  
AND PLATELET ACTIVATION IN PATIENTS WITH A  
PREVIOUS MYOCARDIAL INFARCTION**

|                                 |                                                                                                                                                                                                                                                |
|---------------------------------|------------------------------------------------------------------------------------------------------------------------------------------------------------------------------------------------------------------------------------------------|
| Journal:                        | <i>BMJ Open</i>                                                                                                                                                                                                                                |
| Manuscript ID:                  | bmjopen-2013-003054                                                                                                                                                                                                                            |
| Article Type:                   | Research                                                                                                                                                                                                                                       |
| Date Submitted by the Author:   | 14-Apr-2013                                                                                                                                                                                                                                    |
| Complete List of Authors:       | Din, Jehangir; University of Edinburgh, Cardiology<br>Sarma, Jaydeep<br>Harding, Scott<br>Lyll, Karin<br>Newby, David; University of Edinburgh, Centre for Cardiovascular Sciences<br>Flapan, Andrew; Royal Infirmary of Edinburgh, Cardiology |
| <b>Primary Subject Heading</b>: | Cardiovascular medicine                                                                                                                                                                                                                        |
| Secondary Subject Heading:      | Nutrition and metabolism                                                                                                                                                                                                                       |
| Keywords:                       | Coronary heart disease < CARDIOLOGY, NUTRITION & DIETETICS, VASCULAR MEDICINE                                                                                                                                                                  |
|                                 |                                                                                                                                                                                                                                                |

SCHOLARONE™  
Manuscripts

1  
2  
3  
4  
5  
6 **EFFECT OF OMEGA 3 FATTY ACID SUPPLEMENTATION ON ENDOTHELIAL FUNCTION,**  
7  
8 **ENDOGENOUS FIBRINOLYSIS AND PLATELET ACTIVATION IN PATIENTS WITH A**  
9  
10 **PREVIOUS MYOCARDIAL INFARCTION**

11  
12  
13  
14 Jehangir N Din<sup>1</sup>, Jaydeep Sarma<sup>2</sup>, Scott A Harding<sup>3</sup>, Karin Lyall<sup>1</sup>, David E Newby<sup>1</sup>, Andrew D Flapan<sup>4</sup>  
15  
16

17  
18 <sup>1</sup>Centre for Cardiovascular Sciences, University of Edinburgh, Chancellor's Building, 49 Little France Crescent,  
19  
20 Edinburgh EH16 4SB, United Kingdom; <sup>2</sup>North West Heart Centre, Wythenshawe Hospital, Manchester, United  
21  
22 Kingdom; <sup>3</sup>Department of Cardiology, Wellington Hospital, Wellington, New Zealand; and <sup>4</sup>Edinburgh Heart  
23  
24 Centre, Royal Infirmary of Edinburgh, Edinburgh, United Kingdom.  
25  
26

27 WORD COUNT

28  
29 2801  
30  
31

32  
33 KEY WORDS

34  
35 Omega 3 fatty acids, endothelial function, endogenous fibrinolysis, platelet activation,  
36  
37

38  
39 AUTHOR FOR CORRSPONDENCE

40 Dr Jehangir N Din

41  
42 University of Edinburgh

43  
44 The Chancellor's Building

45  
46 49 Little France Crescent

47  
48 Edinburgh EH16 4SB

49  
50 UNITED KINGDOM

51  
52 Telephone: +44 131 242 1850

53  
54 Fax: +44 131 242 6422

55  
56 E-mail: [jehangirdin@hotmail.com](mailto:jehangirdin@hotmail.com)  
57  
58  
59  
60

## Abstract

**Objective** – The mechanisms through which omega-3 fatty acids reduce adverse cardiac events remain uncertain. We aimed to investigate the effect of omega-3 fatty acid supplementation on endothelial vasomotor function, endogenous fibrinolysis, and platelet and monocyte activation in patients with coronary heart disease.

**Design** – Randomised, double-blind, placebo-controlled, crossover trial.

**Setting** – Academic cardiac centre.

**Participants** - Twenty male patients with a previous myocardial infarction.

**Intervention** - Omega-3 fatty acid supplementation (2g/day for 6-weeks) versus olive oil placebo.

**Outcome measures** - Peripheral blood was taken for analysis of platelet and monocyte activation, and forearm blood flow was assessed in a subset of 12 patients during intrabrachial infusions of acetylcholine, substance P and sodium nitroprusside. Stimulated plasma tissue plasminogen activator (t-PA) concentrations were measured during substance P infusion.

**Results** - All vasodilators caused dose-dependent increases in forearm blood flow ( $P<0.0001$ ). Omega-3 fatty acid supplementation did not affect endothelium-dependent vasodilatation with acetylcholine and substance P compared with placebo ( $P=0.5$  and  $P=0.9$ ). Substance P caused a dose-dependent increase in plasma t-PA concentrations ( $P<0.0001$ ), which was not affected by omega-3 fatty acid supplementation ( $P=0.9$ ). Omega-3 fatty acids did not affect platelet-monocyte aggregation, platelet P-selectin or CD40L, or monocyte CD40.

**Conclusions** – We have demonstrated that dietary supplementation with omega-3 fatty acids does not affect endothelial vasomotor function, endothelial t-PA release or platelet and monocyte activation in patients with coronary heart disease. Cardiac benefits conferred by omega-3 fatty acids in coronary heart disease are unlikely to be mediated through effects on these systems.

## Article Summary

### Article focus

- The mechanisms through which omega-3 fatty acids may reduce adverse cardiac events remain uncertain.
- We have previously demonstrated that omega-3 fatty acids improve endothelial function and endogenous fibrinolysis in healthy cigarette smokers.
- The present study investigated the effect of omega-3 fatty acid supplementation on endothelial vasomotor function, endogenous fibrinolysis, and platelet and monocyte activation in patients with coronary heart disease.

### Key messages

- Omega-3 fatty acid supplementation did not affect endothelium-dependent vasodilatation, acute tPA release, or platelet and monocyte activation in patients with coronary heart disease.
- Any potential cardiac benefits conferred by omega-3 fatty acids in this patient group are unlikely to be mediated by effects on endothelial function, the endogenous fibrinolytic system, or platelet activation.

### Strengths and limitations of this study

- Randomised, double-blind, placebo-controlled crossover design.
- Use of an established and robust model to simultaneously assess both endothelial vasomotor tone and endogenous fibrinolysis: two important and complementary measures of vascular function.
- Limitations: modest sample size.

## Funding statement

JD was supported by a British Heart Foundation Project Grant (PG/2003/009). DEN is supported by the British Heart Foundation. The Wellcome Trust Clinical Research Facility is supported by NHS Research Scotland (NRS) through NHS Lothian.

## Competing interests

None.

For peer review only

## Introduction

Dietary fish or fish oil supplements containing omega-3 fatty acids may protect against cardiovascular disease.<sup>1</sup> Clinical trials have demonstrated beneficial effects on mortality or cardiac events in patients with coronary heart disease.<sup>2-4</sup> However, the mechanisms through which they confer any cardiac benefits are uncertain. Although an effect on ventricular arrhythmias has been thought to be important due to an observed reduction in sudden death,<sup>5,6</sup> subsequent studies have failed to clearly demonstrate an anti-arrhythmic effect.<sup>7</sup> An alternative mechanism may therefore be an effect on the vascular endothelium, as acute myocardial infarction due to plaque rupture and subsequent coronary thrombosis remains the most common cause of sudden cardiac death.<sup>8</sup>

The endothelium regulates vascular tone and blood flow, and mediates thrombosis through the production of factors that influence fibrinolysis and platelet activation. The endogenous fibrinolytic system is responsible for the dissolution of arterial thrombi and is regulated by the endothelium-derived profibrinolytic factor, tissue plasminogen activator (t-PA), and its inhibitor, plasminogen-activator inhibitor type 1 (PAI-1).<sup>9</sup> The rapid release of t-PA from the endothelium is vital, with thrombus dissolution being more effective if t-PA is incorporated early during thrombus formation.<sup>10</sup>

Endothelial cells regulate thrombosis through the release of paracrine factors that mediate platelet function. Activated platelets can bind to leukocytes via a P-selectin dependent mechanism,<sup>11</sup> and these interactions can also be modulated by the CD40 receptor and its ligand.<sup>12</sup> Formation of platelet-leukocyte aggregates or ligation of CD40 can mediate an array of proinflammatory and prothrombotic effects, thereby contributing to endothelial injury and atherothrombosis.<sup>13</sup>

Patients with coronary heart disease demonstrate impaired endothelial function,<sup>14</sup> in addition to increased platelet-monocyte aggregation and upregulation of the CD40/CD40 ligand system.<sup>15,16</sup> We have recently demonstrated that omega-3 fatty acid supplements improve endogenous fibrinolysis and endothelial function in healthy cigarette smokers, a group at high risk of adverse cardiac events.<sup>17</sup>

1  
2  
3 Previously, we have shown that dietary fish intake reduces platelet-monocyte aggregation in man.<sup>18</sup>

4 We therefore hypothesized that omega-3 fatty acid supplementation would improve endothelial  
5 vasomotor function, endogenous fibrinolysis, and markers of platelet and monocyte activation in  
6 patients with coronary heart disease.  
7  
8  
9

10  
11  
12  
13  
14  
15  
16  
17  
18  
19  
20  
21  
22  
23  
24  
25  
26  
27  
28  
29  
30  
31  
32  
33  
34  
35  
36  
37  
38  
39  
40  
41  
42  
43  
44  
45  
46  
47  
48  
49  
50  
51  
52  
53  
54  
55  
56  
57  
58  
59  
60

For peer review only

## Methods

### *Study participants*

Twenty patients with a myocardial infarction at least three months previously were recruited to participate in the study. Myocardial infarction was defined as any two of: typical clinical history, electrocardiographic changes (Q waves in 2 contiguous leads) or elevation of cardiac markers (CKmB or troponin). All subjects gave written informed consent and the study was undertaken with the approval of the local research ethics committee and in accordance with the Declaration of Helsinki. Exclusion criteria included dietary fish allergy or intolerance, consumption of > 1 fish meal per week, renal or hepatic failure, or any intercurrent illness likely to be associated with an inflammatory response.

### *Study design*

This was a prospective, double-blind, placebo-controlled, randomized crossover trial. Subjects were randomized to receive either omega-3 fatty acid supplements (2 g/day, Omacor capsules, Pronova, Norway) or matching placebo capsules (2 g/day olive oil capsules, Eurocaps Limited, Gwent) for a 6-week period. After a 4-week washout phase, participants crossed over to the opposite treatment arm for a further 6-week period. The omega-3 fatty acid capsules contained 85-88% eicosapentaenoic acid (EPA) and docosahexaenoic acid (DHA) as ethyl esters in a ratio of 1.2:1. Both the omega-3 fatty acid capsules and olive oil placebo contained 4 mg  $\alpha$ -tocopherol. All 20 subjects had peripheral blood taken for fasting lipid profile, plasma fatty acid analysis and flow cytometric analysis of platelet activation at baseline and at the end of each treatment period. Two patients dropped out of the study: one was withdrawn after being admitted with unstable angina and a second patient was lost to follow-up. A subset of 12 participants also underwent measurement of forearm blood flow and endogenous fibrinolysis at the end of each treatment period.



### ***Blood collection protocol***

Peripheral venous blood was drawn from a large antecubital vein with a 19-gauge needle and anticoagulated with ethylene diamine tetra-acetic acid (EDTA; 1.6 mg/mL, Sarstedt Monovette) and the direct thrombin inhibitor D-Phenylalanine-L-prolyl-L-arginine chloromethyl ketone (75  $\mu$ M, PPACK, Cambridge Biosciences). Whole blood anticoagulated with PPACK was immunolabelled within 5 min of phlebotomy for subsequent flow cytometric analysis. Plasma was prepared from blood anticoagulated with sodium EDTA by centrifugation (1500 x g for 30 min). Plasma samples were stored at -70°C until analysis.

### ***Flow cytometry***

The following reagents were used: fluorescein isothiocyanate (FITC)-conjugated CD42a (GRP-P, IgG1), FITC-conjugated CD14 (UCHM1, IgG2a), phycoerythrin (PE)-conjugated CD40 (LOB7/6, IgG1), and their appropriate isotype controls (Serotec Ltd; Oxford, UK) as well as PE-conjugated CD154 (TRAP1, IgG1), PE-conjugated CD14 (Tuk-4, IgG2a), PE-conjugated CD 62P (IE3, IgG2a), and their appropriate isotype controls (Dako Cytomation; Buckinghamshire, UK) and FACS-Lyse (Becton-Dickinson; Cowley, UK). Aliquots of whole blood (60  $\mu$ L) anticoagulated with PPACK were incubated with appropriate antibodies and their isotype matched controls for 20 min at room temperature. To evaluate platelet-monocyte aggregates and CD40 on monocytes, samples were fixed and red cells lysed by the addition of 500  $\mu$ L of FACS-Lyse solution. To evaluate platelet surface P-selectin and CD40 ligand, samples were fixed with 1% paraformaldehyde. Samples were analysed using a Coulter EPICS XL flow cytometer equipped with a 488 nm wavelength laser (Beckman Coulter, High Wycombe, UK) within 6 hours of labelling. Monocytes and platelets were identified by gating for CD14 and CD42a positive cells respectively. Platelet-monocyte aggregates were defined as monocytes positive for CD42a. Analyses were performed using EXPO 32 software (Beckman Coulter, High Wycombe, UK).

### *Plasma fatty acid analysis*

The fatty acid composition of plasma phospholipids was determined from blood anticoagulated with EDTA. Total lipids were recovered from 500  $\mu$ L of plasma using dichloro-metane-metanol (2:1) containing 0.005% butyrate hydroxytoluene as an antioxidant (Folch extraction). Phospholipids were isolated by solid-phase extraction using aminopropyl silica columns (IST International), and fatty acids converted into methyl esters by transmethylation with 0.5 M sodium methoxide. Fatty acid methyl ester analysis was performed with an HP-INNOWAX capillary column (Agilent Technologies). Peaks were identified by comparison of retention times with known fatty acid methyl ester standards and quantified using an internal standard. Plasma total phospholipid fatty acids were expressed as the individual fractions of fatty acids and fatty acid groups as relative values (% of total fatty acids). The mean coefficient of variation for the assay was 2.4%

### *Vascular studies*

Studies were carried out in a quiet temperature controlled room (22–25 °C). Subjects fasted for 6 h prior to the study and avoided caffeine and alcohol for the preceding 24 h. Blood pressure and heart rate were recorded throughout the study using a semi-automated non-invasive oscillometric sphygmomanometer (OMRON 705 IT, Kyoto, Japan).

All subjects underwent brachial artery cannulation with a 27-standard wire gauge steel needle under controlled conditions. After a 30-min baseline saline infusion, acetylcholine at 5, 10, and 20  $\mu$ g/min (endothelium-dependent vasodilator that does not release t-PA; Merck Biosciences), substance P at 2, 4, and 8 pmol/min (endothelium-dependent vasodilator that releases t-PA; Clinalfa, Switzerland) and sodium nitroprusside at 2, 4, and 8  $\mu$ g/min (endothelium-independent vasodilator that does not release t-PA; David Bull Laboratories) were infused for 6 min at each dose. The 3 vasodilators were separated by 20-min saline infusions and given in a randomized order.

Forearm blood flow (FBF) was measured in infused and non-infused arms by venous occlusion plethysmography with mercury-in-silicone elastomer strain gauges as described previously.<sup>19</sup> Venous

1  
2  
3 cannulas (17-gauge) were inserted into large subcutaneous veins of the antecubital fossae of both  
4 arms. Blood (10 mL) was withdrawn simultaneously from each arm at baseline and during infusion of  
5 each dose of substance P and collected into acidified buffered citrate (Stabilyte tubes, Biopool  
6 International; for t-PA assays) and into citrate (BD Vacutainer; for PAI-1 assays). Samples were kept  
7 on ice before being centrifuged at 2000 g for 30 min at 4°C. Platelet-free plasma was decanted and  
8 stored at -80°C before assay. Plasma t-PA antigen and activity (t-PA Combi Actibind Elisa Kit;  
9 Technoclone, Vienna, Austria) and PAI-1 antigen and activity (Elitest PAI-1 Antigen and Zymutest  
10 PAI-1 Activity; Hyphen Biomed, Neuville-Sur-Oise, France) concentrations were determined by  
11 enzyme-linked immunosorbent assays. Haematocrit was determined by capillary tube centrifugation at  
12 baseline.  
13  
14  
15  
16  
17  
18  
19  
20  
21  
22  
23  
24

### 25 ***Data analysis and statistical methods***

26  
27 Continuous variables are reported as mean  $\pm$  standard error of the mean. The pre-specified primary  
28 endpoint was endothelial vasomotor and fibrinolytic function. The sample size of n=12 was based on  
29 power calculations derived from previous studies giving 90% power to detect a 17% difference in the  
30 mean t-PA release at a significance level of 5%.<sup>19</sup> The pre-specified secondary endpoint was platelet  
31 and monocyte activation. The sample size of n=20 was based on power calculations derived from  
32 previous studies, giving 90% power to detect a 5% difference in mean platelet-monocyte aggregation  
33 at a significance level of 5%. Forearm plethysmographic data were analyzed as described  
34 previously.<sup>17</sup> Estimated net release of plasma t-PA, has been defined previously as the product of the  
35 infused forearm plasma flow (based on the mean hematocrit and the infused forearm blood flow) and  
36 the concentration difference between the infused and noninfused arms.<sup>19</sup> Statistical analyses were  
37 performed using one-way and two-way ANOVA with Bonferroni's post-tests for multiple  
38 comparisons where appropriate. The statistical methods for each analysis are detailed in the relevant  
39 Figure and Table legends. All calculations were performed using GraphPad Prism (Graph Pad  
40 Software).  
41  
42  
43  
44  
45  
46  
47  
48  
49  
50  
51  
52  
53  
54  
55  
56  
57  
58  
59  
60

## Results

### *Baseline characteristics*

Patients were relatively young and well treated in terms of blood pressure control and lipid profile (Table 1). The mean and median times from myocardial infarction were 12 months and 16 months, respectively. Patients were on standard medical therapy including aspirin, beta-blockers, statins and ACE-inhibitors, and over half had undergone revascularization post-MI.

### *Effect of omega 3 fatty acid supplementation on plasma phospholipid fatty acid composition*

Dietary supplementation with omega-3 fatty acids led to a marked increase in EPA as a percentage of plasma phospholipids compared with both baseline ( $3.7\pm 0.4\%$  versus  $2.0\pm 0.2\%$ ,  $P<0.0001$ ) and placebo ( $3.7\pm 0.4\%$  versus  $1.7\pm 0.1\%$ ,  $P<0.0001$ ; Figure 1A). There was also an increase in DHA compared with baseline ( $5.6\pm 0.2\%$  versus  $4.8\pm 0.3\%$ ,  $P<0.01$ ) and placebo ( $5.6\pm 0.2\%$  versus  $4.4\pm 0.3\%$ ,  $P<0.001$ ; Figure 1B). There was a reduction in the plasma phospholipid percentage of arachadonic acid, but no effect on alpha-linolenic acid, linoleic acid, palmitic acid, stearic acid or oleic acid with either omega-3 fatty acid supplements or olive oil placebo (Table 2).

### *Effect of omega 3 fatty acid supplementation on lipid profile*

Supplementation for 6 weeks with omega 3 fatty acids did not affect total cholesterol, low-density lipoprotein cholesterol, high-density lipoprotein cholesterol or triglycerides (Table 3).

### *Effect of omega 3 fatty acid supplementation on vasomotor function*

Omega-3 fatty acid supplementation did not have any effect on systolic blood pressure, diastolic blood pressure or heart rate compared with placebo (Table 3). During forearm vascular studies substance P, acetylcholine, and sodium nitroprusside led to a dose-dependent increase in absolute forearm blood flow ( $P<0.0001$  for all). Compared with placebo, omega-3 fatty acid supplementation did not affect endothelium-dependent vasodilatation in response to acetylcholine and substance P

1  
2  
3 ( $P=0.5$  and  $P=0.9$ ; Figure 2), or endothelium-independent vasodilatation with sodium nitroprusside  
4  
5 ( $P=0.9$ ; Figure 2).  
6  
7

#### 8 9 ***Effect of omega-3 fatty acid supplementation on stimulated t-PA activity***

10  
11 Substance P infusion caused a dose-dependent increase in plasma t-PA activity concentrations after  
12 both omega-3 fatty acid supplementation and placebo ( $P<0.0001$ ; Table 4). Omega-3 fatty acid  
13 supplementation did not affect plasma TPA activity, TPA antigen or PAI-1 concentrations compared  
14 with placebo (Table 4). There was no difference in net release of t-PA activity after omega-3 fatty  
15 acid supplementation compared with placebo ( $P=0.94$ ; Figure 3).  
16  
17  
18  
19  
20  
21  
22

#### 23 ***Effect of omega-3 fatty acid supplementation on platelet-monocyte aggregation and CD40/CD40*** 24 ***ligand***

25  
26  
27 Supplementation with omega-3 fatty acids did not have any effect on platelet-monocyte aggregation,  
28 platelet-neutrophil aggregation, platelet surface expression of P-selectin or CD40L, or monocyte  
29 expression of CD40 (Table 5).  
30  
31  
32  
33  
34  
35  
36  
37  
38  
39  
40  
41  
42  
43  
44  
45  
46  
47  
48  
49  
50  
51  
52  
53  
54  
55  
56  
57  
58  
59  
60

## Discussion

The present study has demonstrated that dietary supplementation with omega-3 fatty acids does not affect endothelial vasomotor function or endothelial t-PA release in patients with coronary heart disease. There is also no effect on markers of platelet or monocyte activation. These findings suggest that any cardiac benefits conferred by omega-3 fatty acids in coronary heart disease are unlikely to be mediated through effects on endothelial function, endogenous fibrinolysis or platelet activation.

We do not believe the lack of effect on outcome measures in the present study is likely to have been due to poor compliance. The assessment of plasma phospholipid fatty acid composition confirmed substantial increases in the percentage of both EPA and DHA during supplementation with omega-3 fatty acids. The dose and duration of therapy with omega-3 fatty acids are also likely to have been appropriate. We used 2 grams per day of omega-3 fatty acids which is similar to the amount shown to reduce mortality in secondary prevention trials.<sup>2,3</sup> Although we cannot exclude an effect with a longer duration of therapy, 6 weeks of supplementation caused a large increase in the plasma phospholipid content of omega-3 fatty acids and has previously been long enough to demonstrate clear effects on vascular function and platelet activation.<sup>20-22</sup>

Omega-3 fatty acids have previously been shown to have inconsistent effects on endothelial function. Whilst some studies have reported beneficial effects in a variety of populations including healthy volunteers,<sup>22</sup> patients with hyperlipidaemia,<sup>21,23</sup> diabetes mellitus,<sup>24</sup> and heart failure,<sup>25</sup> others have not found any improvement.<sup>26-28</sup> Our findings are in contrast to previous studies in coronary heart disease which demonstrated an improvement in endothelial function with omega-3 fatty acids.<sup>20,29-30</sup> These discrepancies could be partly due to differences in study populations or concomitant medication. However, the previous studies were all either not randomized or double-blinded, and lacked a control group or placebo. Indeed, our trial is the first double-blinded, placebo-controlled trial investigating the effect of omega-3 fatty acids on endothelial vasomotor function in coronary heart disease; we therefore believe our study design and findings are likely to be robust.

1  
2  
3  
4  
5 We also found that omega-3 fatty acids did not augment endogenous fibrinolysis in coronary heart  
6 disease. Previous results have varied widely and it has been concluded that omega-3 fatty acids are  
7 unlikely to influence the fibrinolytic system.<sup>31</sup> Whilst some studies have reported a beneficial impact  
8 on fibrinolytic parameters,<sup>32-33</sup> others have found an adverse effect<sup>34</sup> or no effect.<sup>26,35-37</sup> However,  
9 previous studies have only measured basal plasma t-PA concentrations that do not reflect the local  
10 capacity for acute endothelial t-PA release.<sup>9,38</sup> It is the rapid endogenous release of t-PA from the  
11 endothelium which regulates the dissolution of thrombus and is of greater pathophysiological  
12 relevance. We used an established model of acute endothelial t-PA release that predicts cardiovascular  
13 outcome,<sup>19,39</sup> but found no effect of omega-3 fatty acid supplementation on acute endogenous  
14 fibrinolytic capacity in coronary heart disease.  
15  
16  
17  
18  
19  
20  
21  
22  
23  
24

25  
26  
27 There are several possible explanations for the lack of effect omega-3 fatty acids on endothelial  
28 function and endogenous fibrinolysis observed in the present coronary heart disease population. The  
29 patients were all well treated with modern cardio-active medication known to influence endothelial  
30 vasomotor function.<sup>40-41</sup> In contrast, patients in previous studies demonstrating improved endothelial  
31 function<sup>20,29</sup> and cardiac outcomes<sup>2-3</sup> with omega-3 fatty acids were much less likely to be taking  
32 HMG CoA reductase inhibitors or angiotensin-converting enzyme inhibitors. It is conceivable that  
33 endothelial function cannot be further improved by the addition of omega-3 fatty acids in coronary  
34 heart disease patients already treated with modern medical therapy. This possibility is supported by  
35 the most recent large clinical trials which found a low rate of cardiac events in patients on optimal  
36 medical therapy post-myocardial infarction, which could not be improved with omega-3 fatty acid  
37 supplementation.<sup>42-44</sup>  
38  
39  
40  
41  
42  
43  
44  
45  
46  
47  
48  
49

50  
51  
52 However, concomitant medication may not fully explain the neutral effects on endogenous  
53 fibrinolysis. Whilst lipid-lowering therapy improves endothelial vasomotor function, it has not been  
54 found to influence acute t-PA release.<sup>45</sup> Angiotensin-converting enzyme inhibitors only augment  
55 bradykinin induced t-PA release; they do not affect t-PA release stimulated by substance P.<sup>46</sup>  
56  
57  
58  
59  
60

1  
2  
3 Therefore, there may be other factors to explain why omega-3 fatty acid supplementation can improve  
4 endogenous fibrinolytic capacity in healthy cigarette smokers but not in patients with coronary heart  
5 disease. Perhaps the most likely explanation is that the coronary heart disease group was considerably  
6 older and may have a dysfunctional endothelium and fibrinolytic system less responsive to dietary  
7 interventional measures.  
8  
9  
10  
11  
12

13  
14  
15 Circulating platelet-monocyte aggregates are increased in stable coronary heart disease and acute  
16 coronary syndromes, consistent with an important role in both the development of atherosclerotic  
17 lesions and in acute thrombosis.<sup>15</sup> We have previously demonstrated that moderate intake of oil-rich  
18 fish can significantly reduce platelet-monocyte aggregation.<sup>18</sup> However, we did not observe any effect  
19 of omega-3 fatty acid supplements on these measures of platelet and monocyte activation in the  
20 present study. It is possible our previous results were due to another active ingredient in oily fish  
21 rather than omega-3 fatty acids, and we cannot exclude a dose-effect of omega-3 fatty acids on  
22 platelet activation. Omega-3 fatty acids also had no effect on monocyte expression of CD40 or  
23 platelet surface CD40 ligand, consistent with previous studies which found no effect of either omega-  
24 3 fatty acids or dietary fish on soluble CD40 ligand.<sup>18,47</sup>  
25  
26  
27  
28  
29  
30  
31  
32  
33  
34  
35  
36

### 37 **Conclusions**

38  
39 We have demonstrated that omega-3 fatty acid supplementation does not affect endothelial function,  
40 endogenous fibrinolytic capacity or markers of platelet and monocyte activation in patients with stable  
41 coronary heart disease. A major strength of our study is the use of a robust model to simultaneously  
42 assess both endothelial vasomotor tone and endogenous fibrinolysis: two important and  
43 complementary measures of vascular function. Our results suggest that any potential cardiac benefits  
44 conferred by omega-3 fatty acids in this patient group are unlikely to be mediated by effects on  
45 endothelial function or the fibrinolytic system.  
46  
47  
48  
49  
50  
51  
52  
53  
54  
55  
56  
57  
58  
59  
60



## Funding

None

## Competing Interests

None

## Data sharing

No additional unpublished data from this study.

## Contributorship

- 1) Conception and design or analysis and interpretation of data: JD, KL, SH, JS, AF, DN
- 2) Drafting of the manuscript or revising it critically for intellectual content: JD, JS, AF, DN
- 3) Final approval of the manuscript submitted: All authors.

## References

1. Din JN, Newby DE, Flapan AD. Omega 3 fatty acids and cardiovascular disease - fishing for a natural treatment. *BMJ* 2004;328:30-5.
2. Burr ML, Fehily AM, Gilbert JF, et al. Effects of changes in fat, fish, and fibre intakes on death and myocardial reinfarction: diet and reinfarction trial (DART). *Lancet* 1989;2:757-61.
3. GISSI-Prevenzione Investigators. Dietary supplementation with n-3 polyunsaturated fatty acids and vitamin E after myocardial infarction: results of the GISSI-Prevenzione trial. Gruppo Italiano per lo Studio della Sopravvivenza nell'Infarto miocardico. *Lancet* 1999;354:447-55.
4. Yokoyama M, Origasa H, Matsuzaki M, Matsuzawa Y, Saito Y, Ishikawa Y, Oikawa S, Sasaki J, Hishida H, Itakura H, Kita T, Kitabatake A, Nakaya N, Sakata T, Shimada K, Shirato K; Japan EPA lipid intervention study (JELIS) Investigators. *Lancet*. 2007; 369:1090-8.

- 1  
2  
3 5. Marchioli R, Barzi F, Bomba E, Chieffo C, Di Gregorio D, Di Mascio R, *et al.* Early protection against  
4 sudden death by n-3 polyunsaturated fatty acids after myocardial infarction: time-course analysis of the  
5 results of the Gruppo Italiano per lo Studio della Sopravvivenza nell'Infarto Miocardico (GISSI)-  
6 Prevenzione. *Circulation* 2002;105:1897-903
- 7  
8  
9  
10  
11 6. Leaf A, Kang JX, Xiao YF, Billman GE. Clinical prevention of sudden cardiac death by n-3  
12 polyunsaturated fatty acids and mechanism of prevention of arrhythmias by n-3 fish oils. *Circulation*  
13 2003;107:2646-52.
- 14  
15  
16  
17 7. Brouwer IA, Raitt MH, Dullemeyer C, Kraemer DF, Zock PL, Morris C, Katan MB, Connor WE,  
18 Camm JA, Schouten EG, McAnulty J. Effect of fish oil on ventricular tachyarrhythmia in three studies  
19 in patients with implantable cardioverter defibrillators. *Eur Heart J* 2009;30:820-6.
- 20  
21  
22  
23 8. Bowker TJ, Wood DA, Davies MJ, Sheppard MN, Cary NR, Burton JD, Chambers DR, Dawling S,  
24 Hobson HL, Pyke SD, Riemersma RA, Thompson SG. Sudden, unexpected cardiac or unexplained  
25 death in England: a national survey. *QJM*. 2003;96:269-79.
- 26  
27  
28  
29 9. Oliver JJ, Webb DJ, Newby DE. Stimulated tissue plasminogen activator release as a marker of  
30 endothelial function in humans, *Arterioscler Thromb Vasc Biol* 2005; 25: 2470–2479.
- 31  
32  
33 10. Fox KA, Robison AK, Knobb RM *et al.* Prevention of coronary thrombosis with subthrombolytic doses  
34 of tissue type plasminogen activator. *Circulation* 1985; 72:1346-1354.
- 35  
36  
37 11. Jungi TW, Spycher MO, Nydegger UE, Barandun S. Platelet-leukocyte interaction: selective binding of  
38 thrombin-stimulated platelets to human monocytes, polymorphonuclear leukocytes, and related cell  
39 lines. *Blood* 1986;67:629-36.
- 40  
41  
42  
43 12. Schonbeck U, Lippy P. CD40 signaling and plaque instability. *Circ Res*. 2001; 89: 1092–1103
- 44  
45  
46 13. Huo Y, Schober A, Forlow SB, *et al.* Circulating activated platelets exacerbate atherosclerosis in mice  
47 deficient in apolipoprotein E. *Nat Med* 2003;9:61-7
- 48  
49  
50 14. Zeiher AM, Drexler H, Wollschlager H, Just H. Modulation of coronary vasomotor tone in humans:  
51 progressive endothelial dysfunction with different early stages of coronary atherosclerosis. *Circulation*  
52 1991;83:391-401.
- 53  
54  
55 15. Sarma J, Laan CA, Alam S, Jha A, Fox KA, Dransfield I. Increased platelet binding to circulating  
56 monocytes in acute coronary syndromes. *Circulation* 2002; 105: 2166-71.
- 57  
58  
59  
60

16. Tousoulis D, Antoniadou C, Nikolopoulou A, Koniari K, Vasiliadou C, Marinou K, Koumallos N, Papageorgiou N, Stefanadi E, Siasos G, Stefanadis C. Interaction between cytokines and sCD40L in patients with stable and unstable coronary syndromes. *Eur J Clin Invest*. 2007;37:623-8.
17. Din JN, Archer RM, Harding SA, Sarma J, Lyall K, Flapan AD, Newby DE. Effect of  $\omega$ -3 fatty acid supplementation on endothelial function, endogenous fibrinolysis and platelet activation in male cigarette smokers. *Heart*. 2013; 99:168-74.
18. Din JN, Harding SA, Valerio CJ, Sarma J, Lyall K, Riemersma RA, Newby DE, Flapan AD. Dietary intervention with oil rich fish reduces platelet-monocyte aggregation in man. *Atherosclerosis* 2008;197:290-6.
19. Newby DE, Wright RA, Ludlam CA, Fox KA, Boon NA, Webb DJ. An in vivo model for the assessment of acute fibrinolytic capacity of the endothelium. *Thromb Haemost*. 1997; 78: 1242–1248
20. Tagawa H, Shimokawa H, Tagawa T, Kuroiwa-Matsumoto M, Hirooka Y, Takeshita A. Long-term treatment with eicosapentaenoic acid augments both nitric oxide-mediated and non-nitric oxide-mediated endothelium-dependent forearm vasodilatation in patients with coronary artery disease. *J Cardiovasc Pharmacol*. 1999 Apr;33(4):633-40.
21. Mori TA, Watts GF, Burke V, Hilme E, Puddey IB, Beilin LJ. Differential effects of eicosapentaenoic acid and docosahexaenoic acid on vascular reactivity of the forearm microcirculation in hyperlipidemic, overweight men. *Circulation* 2000;102:1264-9.
22. Chin JP, Gust AP, Nestel PJ, Dart AM. Marine oils dose-dependently inhibit vasoconstriction of forearm resistance vessels in humans. *Hypertension* 1993;21(1):22-8.
23. Goodfellow J, Bellamy MF, Ramsey MW, Jones CJ, Lewis MJ. Dietary supplementation with marine omega-3 fatty acids improve systemic large artery endothelial function in subjects with hypercholesterolemia. *J Am Coll Cardiol*. 2000;35:265-70.
24. McVeigh GE, Brennan GM, Johnston GD, McDermott BJ, McGrath LT, Henry WR, Andrews JW, Hayes JR. Dietary fish oil augments nitric oxide production or release in patients with type 2 (non-insulin-dependent) diabetes mellitus. *Diabetologia*. 1993;36:33-8.
25. Morgan DR, Dixon LJ, Hanratty CG, El-Sherbeeney N, Hamilton PB, McGrath LT, Leahey WJ, Johnston GD, McVeigh GE. Effects of dietary omega-3 fatty acid supplementation on

- 1  
2  
3 endothelium-dependent vasodilation in patients with chronic heart failure. *Am J Cardiol.*  
4  
5 2006;97:547-51.  
6
- 7 26. Woodman RJ, Mori TA, Burke V, Puddey IB, Barden A, Watts GF, Beilin LJ. Effects of purified  
8  
9 eicosapentaenoic acid and docosahexaenoic acid on platelet, fibrinolytic and vascular function in  
10  
11 hypertensive type 2 diabetic patients. *Atherosclerosis* 2003;166:85-93.  
12
- 13 27. Wong CY, Yiu KH, Li SW, Lee S, Tam S, Lau CP, Tse HF. Fish-oil supplement has neutral  
14  
15 effects on vascular and metabolic function but improves renal function in patients with Type 2  
16  
17 diabetes mellitus. *Diabet Med* 2010;27:54-60.  
18
- 19 28. Skulas-Ray AC, Kris-Etherton PM, Harris WS, Vanden Heuvel JP, Wagner PR, West SG. Dose-  
20  
21 response effects of omega-3 fatty acids on triglycerides, inflammation, and endothelial function in  
22  
23 healthy persons with moderate hypertriglyceridemia. *Am J Clin Nutr.* 2011;93:243-52.  
24
- 25 29. Tagawa T, Hirooka Y, Shimokawa H, Hironaga K, Sakai K, Oyama J, Takeshita A. Long-term  
26  
27 treatment with eicosapentaenoic acid improves exercise-induced vasodilation in patients with  
28  
29 coronary artery disease. *Hypertens Res.* 2002;25:823-9.  
30
- 31 30. Haberka M, Mizia-Stec K, Mizia M, Janowska J, Gieszczyk K, Chmiel A, Zahorska-Markiewicz B,  
32  
33 Gąsior Z. N-3 polyunsaturated fatty acids early supplementation improves ultrasound indices of  
34  
35 endothelial function, but not through NO inhibitors in patients with acute myocardial infarction: N-3  
36  
37 PUFA supplementation in acute myocardial infarction. *Clin Nutr* 2011;30:79-85.  
38
- 39 31. Kristensen SD, Iversen AM, Schmidt EB. n-3 polyunsaturated fatty acids and coronary thrombosis.  
40  
41  
42 *Lipids* 2001;36 Suppl:S79-82.  
43
- 44 32. Smith P, Arnesen H, Opstad T, Dahl KH, Eritsland J. Influence of highly concentrated n-3 fatty acids  
45  
46 on serum lipids and hemostatic variables in survivors of myocardial infarction receiving either oral  
47  
48 anticoagulants or matching placebo. *Thromb Res* 1989;53:467-74.  
49
- 50 33. Mehta J, Lawson D, Saldeen TJ. Reduction in plasminogen activator inhibitor-1 (PAI-1) with omega-3  
51  
52 polyunsaturated fatty acid (PUFA) intake. *Am Heart J* 1988;116(5 Pt 1):1201-6.  
53  
54  
55  
56  
57  
58  
59  
60

- 1  
2  
3 34. Spannagl M, Drummer C, Fröschl H, von Schacky C, Landgraf-Leurs MM, Landgraf R, Schramm W.  
4  
5 Plasmatic factors of haemostasis remain essentially unchanged except for PAI activity during n-3 fatty  
6  
7 acid intake in type I diabetes mellitus. *Blood Coagul Fibrinolysis*. 1991;2:259-65.  
8  
9 35. Finnegan YE, Howarth D, Minihane AM, Kew S, Miller GJ, Calder PC, Williams CM. Plant and  
10  
11 marine derived (n-3) polyunsaturated fatty acids do not affect blood coagulation and fibrinolytic  
12  
13 factors in moderately hyperlipidemic humans. *J Nutr* 2003;133:2210-3.  
14  
15 36. Hellsten G, Boman K, Saarem K, Hallmans G, Nilsson TK. Effects on fibrinolytic activity of corn oil  
16  
17 and a fish oil preparation enriched with omega-3-polyunsaturated fatty acids in a long-term study. *Curr*  
18  
19 *Med Res Opin*. 1993;13:133-9.  
20  
21 37. Toft I, Bønaa KH, Ingebretsen OC, Nordøy A, Jenssen T. Fibrinolytic function after dietary  
22  
23 supplementation with omega3 polyunsaturated fatty acids. *Arterioscler Thromb Vasc Biol*.  
24  
25 1997;17:814-9.  
26  
27 38. Hrafnkelsdottir T, Gudnason T, Wall U, Jern C, Jern S. Regulation of local availability of active tissue-  
28  
29 type plasminogen activator in vivo in man. *J Thromb Haemost* 2004; 2: 1960–8.  
30  
31 39. Robinson SD, Ludlam CA, Boon NA, Newby DE. Endothelial fibrinolytic capacity predicts future  
32  
33 adverse cardiovascular events in patients with coronary heart disease. *Arterioscler Thromb Vasc Biol*  
34  
35 2007; 27: 1651–6.  
36  
37 40. Treasure CB, Klein JL, Weintraub WS, Talley JD, Stillabower ME, Kosinski AS, Zhang J, Boccuzzi  
38  
39 SJ, Cedarholm JC, Alexander RW. Beneficial effects of cholesterol-lowering therapy on the coronary  
40  
41 endothelium in patients with coronary artery disease. *N Engl J Med* 1995; 332:481–7.  
42  
43 41. Mancini GB, Henry GC, Macaya C, O'Neill BJ, Pucillo AL, Carere RG, Wargovich TJ, Mudra H,  
44  
45 Lüscher TF, Klibaner MI, Haber HE, Uprichard AC, Pepine CJ, Pitt B. Angiotensin-converting enzyme  
46  
47 inhibition with quinapril improves endothelial vasomotor dysfunction in patients with coronary artery  
48  
49 disease: the TREND (Trial on Reversing ENdothelial Dysfunction) study. *Circulation* 1996; 94: 258–  
50  
51 65.  
52  
53 42. Rauch B, Schiele R, Schneider S, Diller F, Victor N, Gohlke H, Gottwik M, Steinbeck G, Del Castillo  
54  
55 U, Sack R, Worth H, Katus H, Spitzer W, Sabin G, Senges J; OMEGA Study Group. OMEGA, a  
56  
57  
58  
59  
60

- 1  
2  
3 randomized, placebo-controlled trial to test the effect of highly purified omega-3 fatty acids on top of  
4 modern guideline-adjusted therapy after myocardial infarction. *Circulation*. 2010; 122(21):2152-9  
5  
6  
7 43. Galan P, Kesse-Guyot E, Czernichow S, Briancon S, Blacher J, Hercberg S; SU.FOL.OM3  
8 Collaborative Group. Effects of B vitamins and omega 3 fatty acids on cardiovascular diseases: a  
9 randomised placebo controlled trial. *BMJ*. 2010 Nov 29;341:c6273  
10  
11  
12  
13 44. Kromhout D, Giltay EJ, Geleijnse JM; Alpha Omega Trial Group. n-3 fatty acids and cardiovascular  
14 events after myocardial infarction. *N Engl J Med*. 2010; 363:2015-26.  
15  
16  
17 45. Newby DE, Witherow FN, Wright RA, Bloomfield P, Ludlam CA, Boon NA, Fox KA, Webb DJ.  
18 Hypercholesterolaemia and lipid lowering treatment do not affect the acute endogenous fibrinolytic  
19 capacity in vivo. *Heart* 2002; 87: 48 –53.  
20  
21  
22  
23 46. Witherow FN, Dawson P, Ludlam CA, Fox KA, Newby DE. Marked bradykinin-induced tissue  
24 plasminogen activator release in patients with heart failure maintained on long-term angiotensin-  
25 converting enzyme inhibitor therapy. *J Am Coll Cardiol*. 2002; 40: 961-6.  
26  
27  
28  
29 47. Aarsetoy H, Brugger-Andersen T, Hetland O, Grundt H, Nilsen DW. Long term influence of regular  
30 intake of high dose n-3 fatty acids on CD40-ligand, pregnancy-associated plasma protein A and matrix  
31 metalloproteinase-9 following acute myocardial infarction. *Thromb Haemost* 2006;95:329-36.  
32  
33  
34  
35  
36  
37  
38  
39  
40  
41  
42  
43  
44  
45  
46  
47  
48  
49  
50  
51  
52  
53  
54  
55  
56  
57  
58  
59  
60

## Acknowledgements

We are grateful to the Clinical Research Facility at the Royal Infirmary of Edinburgh.

## Authorship

- 1) Conception and design or analysis and interpretation of data: JD, KL, SH, JS, AF, DN
- 2) Drafting of the manuscript or revising it critically for intellectual content: JD, JS, AF, DN
- 3) Final approval of the manuscript submitted: All authors.

## Figure Legends

**Figure 1.** Percentage omega-3 fatty acids in plasma phospholipids at baseline, during omega-3 fatty acid supplementation and placebo. Statistical analyses were performed using one-way ANOVA with repeated measures and Bonferroni's post-tests for multiple comparisons. EPA, eicosapentaenoic acid; DHA, docosahexaenoic acid.

**Figure 2.** Effect of omega-3 fatty acid supplementation on absolute forearm blood flow in response to endothelium-dependent and endothelium-independent vasodilators. Statistical analyses two-way ANOVA and Bonferroni's post-tests for multiple comparisons.

**Figure 3.** Net release of plasma t-PA activity with omega-3 fatty acid supplementation and placebo. Statistical analyses two-way ANOVA and Bonferroni's post-tests for multiple comparisons.



**TABLE 1. Baseline Characteristics**

|                                                       |         |
|-------------------------------------------------------|---------|
| Age, years                                            | 53±3    |
| Body mass index, kg/m <sup>2</sup>                    | 28±1    |
| Systolic blood pressure, mm Hg                        | 137±5   |
| Diastolic blood pressure, mm Hg                       | 78±3    |
| Heart rate, beats per minute                          | 60±2    |
| Total cholesterol, mmol/L                             | 4.2±0.2 |
| LDL cholesterol, mmol/L                               | 2.3±0.2 |
| HDL cholesterol, mmol/L                               | 1.1±0.1 |
| Chol:HDL chol ratio                                   | 3.8±0.2 |
| Triacylglycerol, mmol/L                               | 1.6±0.2 |
| Fasting glucose, mmol/l                               | 5.4±0.1 |
| Time from MI, months                                  | 16±4    |
| Revascularization post-MI, %                          | 56%     |
| Current or ex-smoker, %                               | 61%     |
| Hypertension, %                                       | 11%     |
| Diabetes mellitus, %                                  | 0%      |
| Hyperlipidemia, %                                     | 78%     |
| Family history of premature coronary heart disease, % | 33%     |
| Medical therapy                                       |         |
| Aspirin, %                                            | 100%    |
| Clopidogrel, %                                        | 11%     |
| ACE-inhibitor/Angiotensin-receptor blocker, %         | 56%     |
| Beta-blocker %                                        | 78%     |
| Statin, %                                             | 100%    |

Mean±SEM.

**TABLE 2. Effect of omega-3 fatty acid supplementation on plasma phospholipid fatty acid composition**

|                      | <b>Baseline</b> | <b>Omega-3</b> | <b>Placebo</b> | <b>P value</b> |
|----------------------|-----------------|----------------|----------------|----------------|
| Alpha-linolenic acid | 0.3±0.01        | 0.3±0.02       | 0.3±0.03       | 0.3            |
| Arachadonic acid     | 12.5±0.4        | 11.0±0.3       | 11.6±0.5       | 0.0005         |
| Linoleic acid        | 18.8±0.6        | 19.0±0.6       | 20.0±0.6       | 0.1            |
| Palmitic acid        | 28.2±0.4        | 27.9±0.3       | 28.2±0.3       | 0.6            |
| Stearic acid         | 13.8±0.3        | 14.1±0.2       | 13.9±0.2       | 0.4            |
| Oleic acid           | 13.3±0.5        | 13.0±0.4       | 13.8±0.5       | 0.1            |

Mean±SEM. Data analysed using 1-way ANOVA.

**TABLE 3. Effect of omega-3 fatty acid supplementation on blood pressure and lipid profile**

|                                 | Baseline | Omega 3 | Placebo | P value |
|---------------------------------|----------|---------|---------|---------|
| Heart rate, beats per minute    | 60±3     | 60±2    | 60±2    | 0.9     |
| Systolic blood pressure, mm Hg  | 131±4    | 125±4   | 130±4   | 0.2     |
| Diastolic blood pressure, mm Hg | 77±3     | 74±2    | 74±3    | 0.5     |
| Total cholesterol, mmol/L       | 4.3±0.3  | 3.9±0.3 | 4.0±0.2 | 0.1     |
| LDL cholesterol, mmol/L         | 2.5±0.2  | 2.2±0.3 | 2.2±0.1 | 0.2     |
| HDL cholesterol, mmol/L         | 1.1±0.1  | 1.1±0.1 | 1.1±0.1 | 0.4     |
| Chol:HDL chol ratio             | 3.8±0.3  | 3.5±0.3 | 3.5±0.2 | 0.3     |
| Triacylglycerol, mmol/L         | 1.5±0.2  | 1.3±0.1 | 1.5±0.1 | 0.5     |

Mean±SEM. Data analysed using 1-way ANOVA.

**TABLE 4. Effect of omega 3 fatty acid supplementation on plasma t-PA activity concentrations**

| Substance P pmol/min                                                           | Omega-3 fatty acids |            |            |            | Placebo    |            |            |            |
|--------------------------------------------------------------------------------|---------------------|------------|------------|------------|------------|------------|------------|------------|
|                                                                                | 0                   | 2          | 4          | 8          | 0          | 2          | 4          | 8          |
| t-PA activity, IU mL <sup>-1</sup>                                             |                     |            |            |            |            |            |            |            |
| Non-infused arm                                                                | 0.39±0.08           | 0.45±0.09  | 0.54±0.12  | 0.64±0.14  | 0.45±0.07  | 0.52±0.08  | 0.60±0.09  | 0.65±0.11  |
| Infused arm                                                                    | 0.38±0.08           | 0.83±0.16  | 1.12±0.23  | 1.67±0.38  | 0.43±0.07  | 0.78±0.10  | 1.09±0.11  | 1.26±0.15  |
| t-PA antigen, ng mL <sup>-1</sup>                                              |                     |            |            |            |            |            |            |            |
| Non-infused arm                                                                | 11.78±1.29          | 12.01±1.0  | 12.69±1.08 | 12.83±1.49 | 13.45±1.40 | 12.93±1.70 | 13.08±1.80 | 12.37±1.27 |
| Infused arm                                                                    | 11.90±1.45          | 13.98±1.33 | 13.63±1.12 | 14.86±1.40 | 12.55±1.10 | 12.85±1.44 | 13.45±1.35 | 13.97±1.55 |
| PAI-1 activity, ng mL <sup>-1</sup>                                            |                     |            |            |            |            |            |            |            |
| Non-infused arm                                                                | 1.77±0.53           | 1.84±0.43  | 1.80±0.42  | 1.64±0.45  | 1.44±0.29  | 1.38±0.26  | 1.39±0.47  | 1.34±0.44  |
| Infused arm                                                                    | 2.33±0.86           | 2.18±0.61  | 2.21±0.69  | 1.92±0.63  | 1.69±0.46  | 1.64±0.41  | 1.54±0.39  | 1.49±0.39  |
| PAI-1 antigen, ng mL <sup>-1</sup>                                             |                     |            |            |            |            |            |            |            |
| Non-infused arm                                                                | 39.51±9.22          | 40.84±7.08 | 39.99±6.62 | 38.48±5.79 | 45.06±7.09 | 43.33±6.45 | 44.41±6.67 | 44.26±7.03 |
| Infused arm                                                                    | 37.64±8.36          | 38.83±6.25 | 41.71±5.74 | 40.26±7.32 | 48.89±8.25 | 42.65±6.59 | 43.12±6.60 | 40.61±6.46 |
| Net t-PA antigen release<br>ng 100 mL <sup>-1</sup> of tissue mm <sup>-1</sup> | 0.23±0.51           | -0.28±4.7  | 3.92±1.8   | 8.41±2.94  | -0.87±1.1  | -0.84±2.82 | 0.94±4.22  | 8.10±3.67  |

Mean±SEM. Data analysed using 2-way ANOVA.

t-PA activity: Dose response  $P<0.0001$ . Omega-3 fatty acids versus placebo;  $P=0.83$  (infused arm).

t-PA antigen: Dose response  $P=0.7$ . Omega-3 fatty acids versus placebo;  $P=0.60$  (infused arm).

PAI-1 activity: Dose response  $P=0.94$ . Omega-3 fatty acids versus placebo;  $P=0.17$  (infused arm).

PAI-1 antigen: Dose response  $P=0.67$ . Omega-3 fatty acids versus placebo;  $P=0.40$  (infused arm).

Net t-PA antigen: Dose response  $P=0.02$ . Omega-3 fatty acids versus placebo;  $P=0.62$  (infused arm).

**TABLE 5. Effect of omega 3 fatty acid supplementation on platelet-monocyte aggregation and CD40/CD40 ligand system**

|                                              | <b>Baseline</b> | <b>Omega 3</b> | <b>Placebo</b> | <b>P value</b> |
|----------------------------------------------|-----------------|----------------|----------------|----------------|
| Platelet-monocyte aggregates, %              | 21.2±3.9        | 23.6±4.2       | 23.0±4.1       | 0.7            |
| Platelet-neutrophil aggregates, %            | 4.9±1.0         | 6.7±1.2        | 6.7±1.1        | 0.1            |
| Platelet-surface expression of P-selectin, % | 3.9±0.9         | 5.0±1.0        | 4.3±1.0        | 0.3            |
| Platelet-surface expression of CD40L, %      | 3.6±0.4         | 3.4±0.3        | 3.4±0.3        | 0.9            |
| Monocyte expression of CD40, %               | 52.5±5.0        | 46.8±3.4       | 47.4±2.5       | 0.5            |

Mean±SEM. Data analysed using 1-way ANOVA.

Figure 1

1  
2  
3  
4  
5  
6  
7  
8  
9  
10  
11  
12  
13  
14  
15  
16  
17  
18  
19  
20  
21  
22  
23  
24  
25  
26  
27  
28  
29  
30  
31  
32  
33  
34  
35  
36  
37  
38  
39  
40  
41  
42  
43

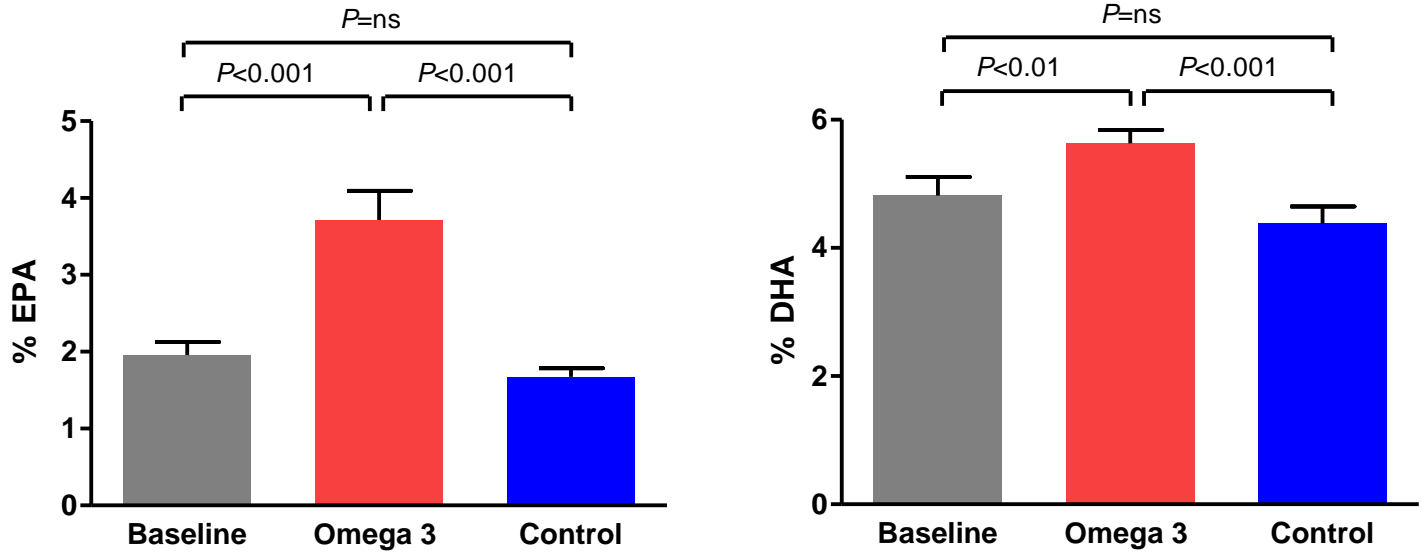

Figure 2

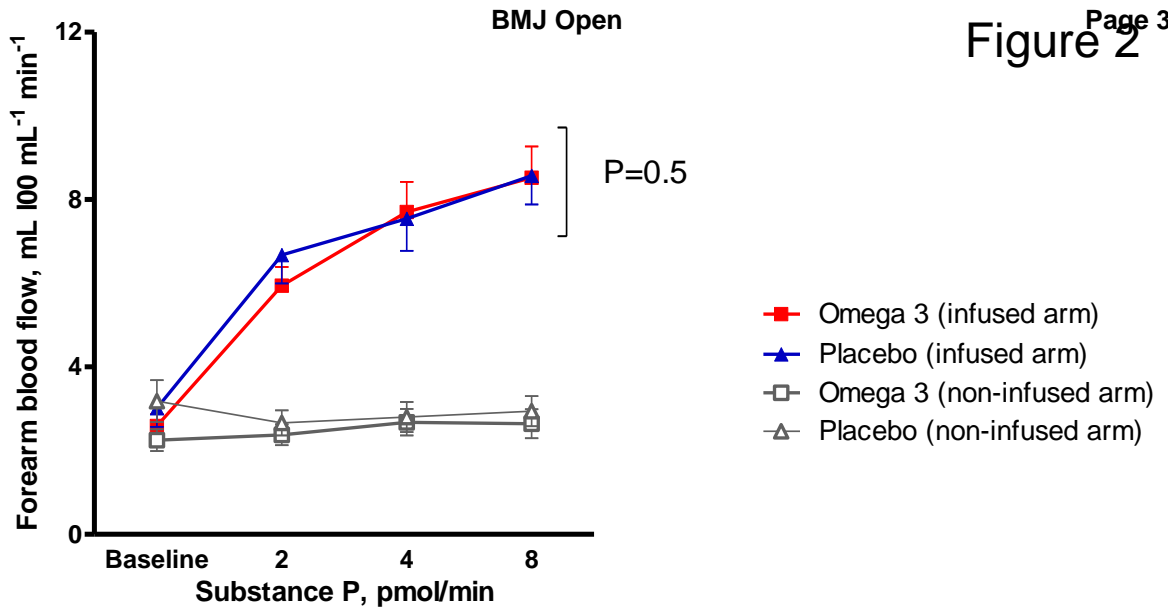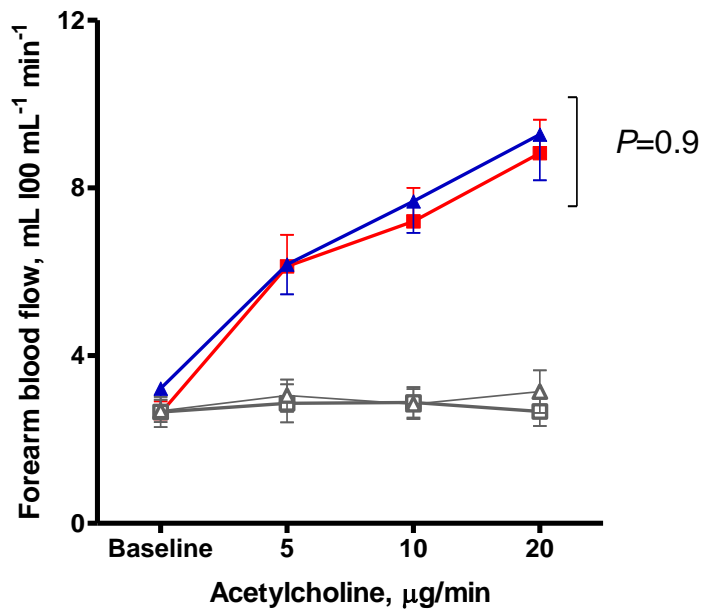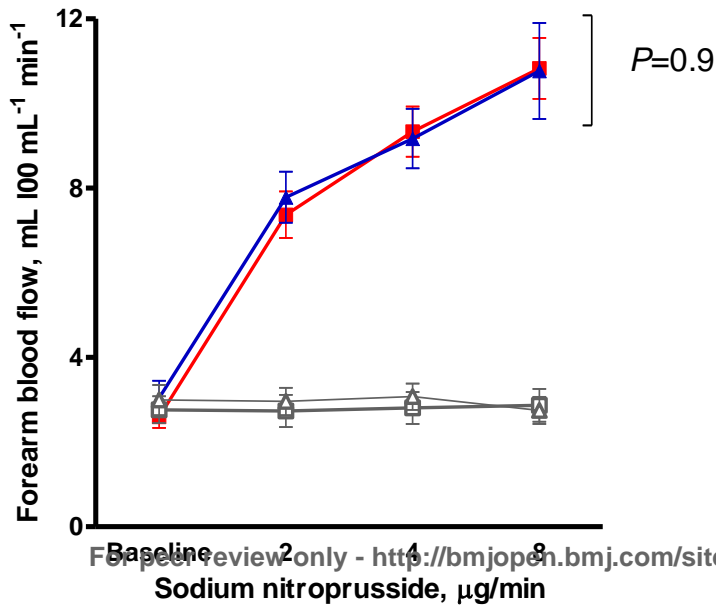

1  
2  
3  
4  
5  
6  
7  
8  
9  
10  
11  
12  
13  
14  
15  
16  
17  
18  
19  
20  
21  
22  
23  
24  
25  
26  
27  
28  
29  
30  
31  
32  
33  
34  
35  
36  
37  
38  
39  
40  
41  
42  
43  
44  
45  
46  
47  
48  
49  
50  
51  
52  
53  
54  
55  
56  
57  
58

Figure 3

1  
2  
3  
4  
5  
6  
7  
8  
9  
10  
11  
12  
13  
14  
15  
16  
17  
18  
19  
20  
21  
22  
23  
24  
25  
26  
27  
28  
29  
30  
31  
32  
33  
34  
35  
36  
37  
38  
39  
40  
41  
42  
43

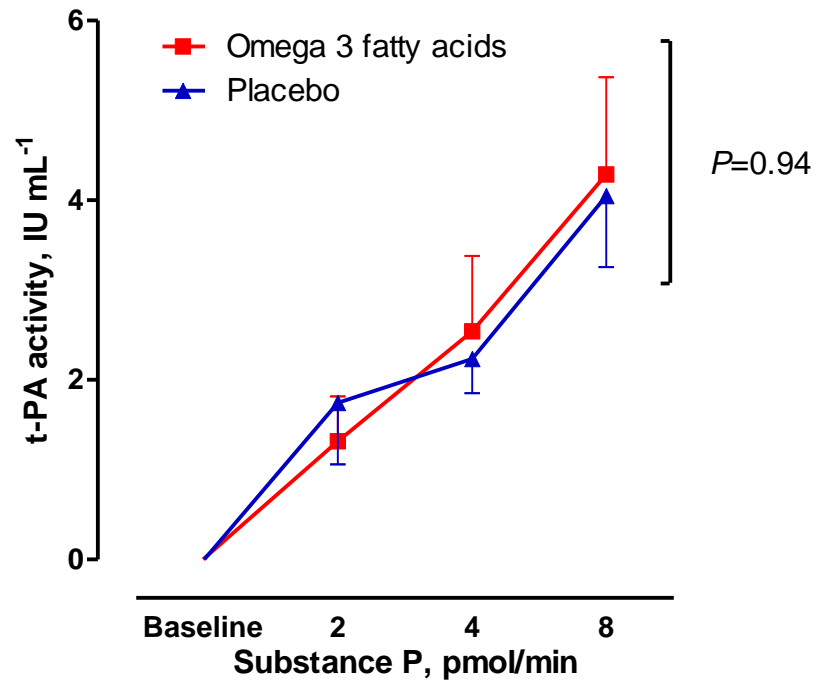





**EFFECT OF OMEGA 3 FATTY ACID SUPPLEMENTATION ON  
ENDOTHELIAL FUNCTION, ENDOGENOUS FIBRINOLYSIS  
AND PLATELET ACTIVATION IN PATIENTS WITH A  
PREVIOUS MYOCARDIAL INFARCTION: A RANDOMISED  
CONTROLLED TRIAL**

|                                 |                                                                                                                                                                                                                                                                                                                                                                                                                                     |
|---------------------------------|-------------------------------------------------------------------------------------------------------------------------------------------------------------------------------------------------------------------------------------------------------------------------------------------------------------------------------------------------------------------------------------------------------------------------------------|
| Journal:                        | <i>BMJ Open</i>                                                                                                                                                                                                                                                                                                                                                                                                                     |
| Manuscript ID:                  | bmjopen-2013-003054.R1                                                                                                                                                                                                                                                                                                                                                                                                              |
| Article Type:                   | Research                                                                                                                                                                                                                                                                                                                                                                                                                            |
| Date Submitted by the Author:   | 05-Jul-2013                                                                                                                                                                                                                                                                                                                                                                                                                         |
| Complete List of Authors:       | Din, Jehangir; University of Edinburgh, Centre for Cardiovascular Sciences<br>Sarma, Jaydeep; Wythenshawe Hospital, North West Heart Centre<br>Harding, Scott; Wellington Hospital, 3Department of Cardiology<br>Lyll, Karin; University of Edinburgh, 1Centre for Cardiovascular Sciences<br>Newby, David; University of Edinburgh, Centre for Cardiovascular Sciences<br>Flapan, Andrew; Royal Infirmary of Edinburgh, Cardiology |
| <b>Primary Subject Heading</b>: | Cardiovascular medicine                                                                                                                                                                                                                                                                                                                                                                                                             |
| Secondary Subject Heading:      | Nutrition and metabolism                                                                                                                                                                                                                                                                                                                                                                                                            |
| Keywords:                       | Coronary heart disease < CARDIOLOGY, NUTRITION & DIETETICS,<br>VASCULAR MEDICINE                                                                                                                                                                                                                                                                                                                                                    |
|                                 |                                                                                                                                                                                                                                                                                                                                                                                                                                     |

SCHOLARONE™  
Manuscripts

only

1  
2  
3  
4  
5  
6 **EFFECT OF OMEGA 3 FATTY ACID SUPPLEMENTATION ON ENDOTHELIAL FUNCTION,**  
7  
8 **ENDOGENOUS FIBRINOLYSIS AND PLATELET ACTIVATION IN PATIENTS WITH A**  
9  
10 **PREVIOUS MYOCARDIAL INFARCTION: A RANDOMISED CONTROLLED TRIAL**  
11

12  
13  
14 Jehangir N Din<sup>1</sup>, Jaydeep Sarma<sup>2</sup>, Scott A Harding<sup>3</sup>, Karin Lyall<sup>1</sup>, David E Newby<sup>1</sup>, Andrew D Flapan<sup>4</sup>  
15  
16

17  
18 <sup>1</sup>Centre for Cardiovascular Sciences, University of Edinburgh, Chancellor's Building, 49 Little France Crescent,  
19  
20 Edinburgh EH16 4SB, United Kingdom; <sup>2</sup>North West Heart Centre, Wythenshawe Hospital, Manchester, United  
21  
22 Kingdom; <sup>3</sup>Department of Cardiology, Wellington Hospital, Wellington, New Zealand; and <sup>4</sup>Edinburgh Heart  
23  
24 Centre, Royal Infirmary of Edinburgh, Edinburgh, United Kingdom.  
25

26  
27 WORD COUNT 2801  
28

29 ClinicalTrials.gov Identifier: NCT01888211  
30  
31

32  
33 KEY WORDS  
34

35 Omega 3 fatty acids, endothelial function, endogenous fibrinolysis, platelet activation,  
36  
37

38  
39 AUTHOR FOR CORRSPONDENCE

40 Dr Jehangir N Din  
41

42 University of Edinburgh  
43

44 The Chancellor's Building  
45

46 49 Little France Crescent  
47

48 Edinburgh EH16 4SB  
49

50 UNITED KINGDOM  
51

52 Telephone: +44 131 242 1850  
53

54 Fax: +44 131 242 6422  
55

56 E-mail: [jehangirdin@hotmail.com](mailto:jehangirdin@hotmail.com)  
57  
58  
59  
60

## Abstract

**Objective** – The mechanisms through which omega-3 fatty acids reduce adverse cardiac events remain uncertain. We aimed to investigate the effect of omega-3 fatty acid supplementation on endothelial vasomotor function, endogenous fibrinolysis, and platelet and monocyte activation in patients with coronary heart disease.

**Design** – Randomised, double-blind, placebo-controlled, crossover trial.

**Setting** – Academic cardiac centre.

**Participants** - Twenty male patients with a previous myocardial infarction.

**Intervention** - Omega-3 fatty acid supplementation (2g/day for 6-weeks) versus olive oil placebo.

**Outcome measures** - Peripheral blood was taken for analysis of platelet and monocyte activation, and forearm blood flow was assessed in a subset of 12 patients during intrabrachial infusions of acetylcholine, substance P and sodium nitroprusside. Stimulated plasma tissue plasminogen activator (t-PA) concentrations were measured during substance P infusion.

**Results** - All vasodilators caused dose-dependent increases in forearm blood flow ( $P<0.0001$ ). Omega-3 fatty acid supplementation did not affect endothelium-dependent vasodilatation with acetylcholine and substance P compared with placebo ( $P=0.5$  and  $P=0.9$ ). Substance P caused a dose-dependent increase in plasma t-PA concentrations ( $P<0.0001$ ), which was not affected by omega-3 fatty acid supplementation ( $P=0.9$ ). Omega-3 fatty acids did not affect platelet-monocyte aggregation, platelet P-selectin or CD40L, or monocyte CD40.

**Conclusions** – We have demonstrated that dietary supplementation with omega-3 fatty acids does not affect endothelial vasomotor function, endothelial t-PA release or platelet and monocyte activation in patients with coronary heart disease. Cardiac benefits conferred by omega-3 fatty acids in coronary heart disease are unlikely to be mediated through effects on these systems.

## Article Summary

### Article focus

- The mechanisms through which omega-3 fatty acids may reduce adverse cardiac events remain uncertain.
- We have previously demonstrated that omega-3 fatty acids improve endothelial function and endogenous fibrinolysis in healthy cigarette smokers.
- The present study investigated the effect of omega-3 fatty acid supplementation on endothelial vasomotor function, endogenous fibrinolysis, and platelet and monocyte activation in patients with coronary heart disease.

### Key messages

- Omega-3 fatty acid supplementation did not affect endothelium-dependent vasodilatation, acute tPA release, or platelet and monocyte activation in patients with coronary heart disease.
- Any potential cardiac benefits conferred by omega-3 fatty acids in this patient group are unlikely to be mediated by effects on endothelial function, the endogenous fibrinolytic system, or platelet activation.

### Strengths and limitations of this study

- Randomised, double-blind, placebo-controlled crossover design.
- Use of an established and robust model to simultaneously assess both endothelial vasomotor tone and endogenous fibrinolysis: two important and complementary measures of vascular function.
- Limitations: modest sample size.

## Introduction

Dietary fish or fish oil supplements containing omega-3 fatty acids may protect against cardiovascular disease.<sup>1</sup> Clinical trials have demonstrated beneficial effects on mortality or cardiac events in patients with coronary heart disease.<sup>2-4</sup> However, the mechanisms through which they confer cardiac benefits are uncertain. Although an effect on ventricular arrhythmias has been thought to be important due to an observed reduction in sudden death,<sup>5,6</sup> subsequent studies have failed to clearly demonstrate an anti-arrhythmic effect.<sup>7</sup> An alternative mechanism may therefore be an effect on the vascular endothelium, as acute myocardial infarction due to plaque rupture and subsequent coronary thrombosis remains the most common cause of sudden cardiac death.<sup>8</sup>

The endothelium regulates vascular tone and blood flow, and mediates thrombosis through the production of factors that influence fibrinolysis and platelet activation. The endogenous fibrinolytic system is responsible for the dissolution of arterial thrombi and is regulated by the endothelium-derived profibrinolytic factor, tissue plasminogen activator (t-PA), and its inhibitor, plasminogen-activator inhibitor type 1 (PAI-1).<sup>9</sup> The rapid release of t-PA from the endothelium is vital, with thrombus dissolution being more effective if t-PA is incorporated early during thrombus formation.<sup>10</sup>

Endothelial cells regulate thrombosis through the release of paracrine factors that mediate platelet function. Activated platelets can bind to leukocytes via a P-selectin dependent mechanism,<sup>11</sup> and these interactions can also be modulated by the CD40 receptor and its ligand.<sup>12</sup> Formation of platelet-leukocyte aggregates or ligation of CD40 can mediate an array of proinflammatory and prothrombotic effects, thereby contributing to endothelial injury and atherothrombosis.<sup>13</sup>

Patients with coronary heart disease demonstrate impaired endothelial function,<sup>14</sup> in addition to increased platelet-monocyte aggregation and upregulation of the CD40/CD40 ligand system.<sup>15,16</sup> We have recently demonstrated that omega-3 fatty acid supplements improve endogenous fibrinolysis and endothelial function in healthy cigarette smokers, a group at high risk of adverse cardiac events.<sup>17</sup>

1  
2  
3 Previously, we have shown that dietary fish intake reduces platelet-monocyte aggregation in man.<sup>18</sup>

4  
5 We therefore hypothesized that omega-3 fatty acid supplementation would improve endothelial  
6  
7 vasomotor function, endogenous fibrinolysis, and markers of platelet and monocyte activation in  
8  
9 patients with coronary heart disease.  
10  
11  
12  
13  
14  
15  
16  
17  
18  
19  
20  
21  
22  
23  
24  
25  
26  
27  
28  
29  
30  
31  
32  
33  
34  
35  
36  
37  
38  
39  
40  
41  
42  
43  
44  
45  
46  
47  
48  
49  
50  
51  
52  
53  
54  
55  
56  
57  
58  
59  
60

For peer review only

## Methods

### *Study participants*

Twenty patients with a myocardial infarction at least three months previously were recruited to participate in the study. Myocardial infarction was defined as any two of: typical clinical history, electrocardiographic changes (Q waves in 2 contiguous leads) or elevation of cardiac markers (CKmB or troponin). All subjects gave written informed consent and the study was undertaken with the approval of the local research ethics committee and in accordance with the Declaration of Helsinki. Exclusion criteria included dietary fish allergy or intolerance, consumption of > 1 fish meal per week, renal or hepatic failure, or any intercurrent illness likely to be associated with an inflammatory response. The first patient was randomised in December 2004 and the last study visit took place in June 2006. There were logistical delays in the analysis of frozen plasma samples and the final data became available for analysis in June 2009.

### *Study design*

This was a prospective, double-blind, placebo-controlled, randomized crossover trial. Subjects were randomized to receive either omega-3 fatty acid supplements (2 g/day, Omacor capsules, Pronova, Norway) or matching placebo capsules (2 g/day olive oil capsules, Eurocaps Limited, Gwent) for a 6-week period. After a 4-week washout phase, participants crossed over to the opposite treatment arm for a further 6-week period. The omega 3 fatty acid supplements and placebo were packaged and dispensed in identical containers by the Royal Infirmary of Edinburgh Pharmacy. All study participants and investigators were blinded to the study allocation. The randomization schedule was generated by an investigator not involved in the study, and securely kept in the Royal Infirmary of Edinburgh Pharmacy. The omega-3 fatty acid capsules contained 85-88% eicosapentaenoic acid (EPA) and docosahexaenoic acid (DHA) as ethyl esters in a ratio of 1.2:1. Both the omega-3 fatty acid capsules and olive oil placebo contained 4 mg  $\alpha$ -tocopherol. All 20 subjects had peripheral blood taken for fasting lipid profile, plasma fatty acid analysis and flow cytometric analysis of platelet activation at baseline and at the end of each treatment period. Two patients dropped out of the study:

1  
2  
3 one was withdrawn after being admitted with unstable angina and a second patient was lost to follow-  
4  
5 up. A subset of 12 participants also underwent measurement of forearm blood flow and endogenous  
6  
7 fibrinolysis at the end of each treatment period.  
8  
9  
10  
11  
12  
13  
14  
15  
16  
17  
18  
19  
20  
21  
22  
23  
24  
25  
26  
27  
28  
29  
30  
31  
32  
33  
34  
35  
36  
37  
38  
39  
40  
41  
42  
43  
44  
45  
46  
47  
48  
49  
50  
51  
52  
53  
54  
55  
56  
57  
58  
59  
60

For peer review only



### ***Blood collection protocol***

Peripheral venous blood was drawn from a large antecubital vein with a 19-gauge needle and anticoagulated with ethylene diamine tetra-acetic acid (EDTA; 1.6 mg/mL, Sarstedt Monovette) and the direct thrombin inhibitor D-Phenylalanine-L-prolyl-L-arginine chloromethyl ketone (75  $\mu$ M, PPACK, Cambridge Biosciences). Whole blood anticoagulated with PPACK was immunolabelled within 5 min of phlebotomy for subsequent flow cytometric analysis. Plasma was prepared from blood anticoagulated with sodium EDTA by centrifugation (1500 x g for 30 min). Plasma samples were stored at -70°C until analysis.

### ***Flow cytometry***

The following reagents were used: fluorescein isothiocyanate (FITC)-conjugated CD42a (GRP-P, IgG1), FITC-conjugated CD14 (UCHM1, IgG2a), phycoerythrin (PE)-conjugated CD40 (LOB7/6, IgG1), and their appropriate isotype controls (Serotec Ltd; Oxford, UK) as well as PE-conjugated CD154 (TRAP1, IgG1), PE-conjugated CD14 (Tuk-4, IgG2a), PE-conjugated CD 62P (IE3, IgG2a), and their appropriate isotype controls (Dako Cytomation; Buckinghamshire, UK) and FACS-Lyse (Becton-Dickinson; Cowley, UK). Aliquots of whole blood (60  $\mu$ L) anticoagulated with PPACK were incubated with appropriate antibodies and their isotype matched controls for 20 min at room temperature. To evaluate platelet-monocyte aggregates and CD40 on monocytes, samples were fixed and red cells lysed by the addition of 500  $\mu$ L of FACS-Lyse solution. To evaluate platelet surface P-selectin and CD40 ligand, samples were fixed with 1% paraformaldehyde. Samples were analysed using a Coulter EPICS XL flow cytometer equipped with a 488 nm wavelength laser (Beckman Coulter, High Wycombe, UK) within 6 hours of labelling. Monocytes and platelets were identified by gating for CD14 and CD42a positive cells respectively. Platelet-monocyte aggregates were defined as monocytes positive for CD42a. Analyses were performed using EXPO 32 software (Beckman Coulter, High Wycombe, UK).

### *Plasma fatty acid analysis*

The fatty acid composition of plasma phospholipids was determined from blood anticoagulated with EDTA. Total lipids were recovered from 500  $\mu$ L of plasma using dichloro-metane-metanol (2:1) containing 0.005% butyrate hydroxytoluene as an antioxidant (Folch extraction). Phospholipids were isolated by solid-phase extraction using aminopropyl silica columns (IST International), and fatty acids converted into methyl esters by transmethylation with 0.5 M sodium methoxide. Fatty acid methyl ester analysis was performed with an HP-INNOWAX capillary column (Agilent Technologies). Peaks were identified by comparison of retention times with known fatty acid methyl ester standards and quantified using an internal standard. Plasma total phospholipid fatty acids were expressed as the individual fractions of fatty acids and fatty acid groups as relative values (% of total fatty acids). The mean coefficient of variation for the assay was 2.4%

### *Vascular studies*

Studies were carried out in a quiet temperature controlled room (22–25 °C). Subjects fasted for 6 h prior to the study and avoided caffeine and alcohol for the preceding 24 h. Blood pressure and heart rate were recorded throughout the study using a semi-automated non-invasive oscillometric sphygmomanometer (OMRON 705 IT, Kyoto, Japan).

All subjects underwent brachial artery cannulation with a 27-standard wire gauge steel needle under controlled conditions. After a 30-min baseline saline infusion, acetylcholine at 5, 10, and 20  $\mu$ g/min (endothelium-dependent vasodilator that does not release t-PA; Merck Biosciences), substance P at 2, 4, and 8 pmol/min (endothelium-dependent vasodilator that releases t-PA; Clinalfa, Switzerland) and sodium nitroprusside at 2, 4, and 8  $\mu$ g/min (endothelium-independent vasodilator that does not release t-PA; David Bull Laboratories) were infused for 6 min at each dose. The 3 vasodilators were separated by 20-min saline infusions and given in a randomized order.

Forearm blood flow (FBF) was measured in infused and non-infused arms by venous occlusion plethysmography with mercury-in-silicone elastomer strain gauges as described previously.<sup>19</sup> Venous

1  
2  
3 cannulas (17-gauge) were inserted into large subcutaneous veins of the antecubital fossae of both  
4 arms. Blood (10 mL) was withdrawn simultaneously from each arm at baseline and during infusion of  
5 each dose of substance P and collected into acidified buffered citrate (Stabilyte tubes, Biopool  
6 International; for t-PA assays) and into citrate (BD Vacutainer; for PAI-1 assays). Samples were kept  
7 on ice before being centrifuged at 2000 g for 30 min at 4°C. Platelet-free plasma was decanted and  
8 stored at -80°C before assay. Plasma t-PA antigen and activity (t-PA Combi Actibind Elisa Kit;  
9 Technoclone, Vienna, Austria) and PAI-1 antigen and activity (Elitest PAI-1 Antigen and Zymutest  
10 PAI-1 Activity; Hyphen Biomed, Neuville-Sur-Oise, France) concentrations were determined by  
11 enzyme-linked immunosorbent assays. Haematocrit was determined by capillary tube centrifugation at  
12 baseline.  
13  
14  
15  
16  
17  
18  
19  
20  
21  
22  
23  
24

#### 25 ***Data analysis and statistical methods***

26  
27 Continuous variables are reported as mean  $\pm$  standard error of the mean. The pre-specified primary  
28 endpoint was endothelial vasomotor and fibrinolytic function. The sample size of n=12 was based on  
29 power calculations derived from previous studies giving 90% power to detect a 17% difference in the  
30 mean t-PA release at a significance level of 5%.<sup>19</sup> The pre-specified secondary endpoint was platelet  
31 and monocyte activation. The sample size of n=20 was based on power calculations derived from  
32 previous studies, giving 90% power to detect a 5% difference in mean platelet-monocyte aggregation  
33 at a significance level of 5%. Forearm plethysmographic data were analyzed as described  
34 previously.<sup>17</sup> Estimated net release of plasma t-PA, has been defined previously as the product of the  
35 infused forearm plasma flow (based on the mean hematocrit and the infused forearm blood flow) and  
36 the concentration difference between the infused and noninfused arms.<sup>19</sup> Statistical analyses were  
37 performed using one-way and two-way ANOVA with Bonferroni's post-tests for multiple  
38 comparisons where appropriate. The statistical methods for each analysis are detailed in the relevant  
39 Figure and Table legends. All calculations were performed using GraphPad Prism (Graph Pad  
40 Software).  
41  
42  
43  
44  
45  
46  
47  
48  
49  
50  
51  
52  
53  
54  
55  
56  
57  
58  
59  
60

## Results

### *Baseline characteristics*

Participant flow through the study including a CONSORT diagram is included in the Supplementary File. Patients were relatively young and well treated in terms of blood pressure control and lipid profile (Table 1). The mean and median times from myocardial infarction were 12 months and 16 months, respectively. Patients were on standard medical therapy including aspirin, beta-blockers, statins and ACE-inhibitors, and over half had undergone revascularization post-MI.

### *Effect of omega 3 fatty acid supplementation on plasma phospholipid fatty acid composition*

Dietary supplementation with omega-3 fatty acids led to a marked increase in EPA as a percentage of plasma phospholipids compared with both baseline ( $3.7\pm 0.4\%$  versus  $2.0\pm 0.2\%$ ,  $P<0.0001$ ) and placebo ( $3.7\pm 0.4\%$  versus  $1.7\pm 0.1\%$ ,  $P<0.0001$ ; Table 2). There was also an increase in DHA compared with baseline ( $5.6\pm 0.2\%$  versus  $4.8\pm 0.3\%$ ,  $P<0.01$ ) and placebo ( $5.6\pm 0.2\%$  versus  $4.4\pm 0.3\%$ ,  $P<0.0001$ ; Table 2). We did not detect any carry-over of EPA or DHA after 6 weeks of placebo in the group who had omega-3 fatty acids first (data not shown). There was a reduction in the plasma phospholipid percentage of arachidonic acid, but no effect on alpha-linolenic acid, linoleic acid, palmitic acid, stearic acid or oleic acid with either omega-3 fatty acid supplements or olive oil placebo (Table 2).

### *Effect of omega 3 fatty acid supplementation on lipid profile*

Supplementation for 6 weeks with omega 3 fatty acids did not affect total cholesterol, low-density lipoprotein cholesterol, high-density lipoprotein cholesterol or triglycerides (data not shown).

### *Effect of omega 3 fatty acid supplementation on vasomotor function*

Omega-3 fatty acid supplementation did not have any effect on systolic blood pressure, diastolic blood pressure or heart rate compared with placebo (data not shown). During forearm vascular studies substance P, acetylcholine, and sodium nitroprusside led to a dose-dependent increase in absolute

1  
2  
3 forearm blood flow ( $P<0.0001$  for all). Compared with placebo, omega-3 fatty acid supplementation  
4  
5 did not affect endothelium-dependent vasodilatation in response to acetylcholine or substance P  
6  
7 ( $P=0.5$  and  $P=0.9$ ; Figure 1), or endothelium-independent vasodilatation with sodium nitroprusside  
8  
9 ( $P=0.9$ ; Figure 1).

#### 10 11 12 13 ***Effect of omega-3 fatty acid supplementation on stimulated t-PA activity***

14  
15 Substance P infusion caused a dose-dependent increase in plasma t-PA activity concentrations after  
16  
17 both omega-3 fatty acid supplementation and placebo ( $P<0.0001$ ; Table 3). Omega-3 fatty acid  
18  
19 supplementation did not affect plasma TPA activity, TPA antigen or PAI-1 concentrations compared  
20  
21 with placebo (Table 3). There was no difference in net release of t-PA activity after omega-3 fatty  
22  
23 acid supplementation compared with placebo ( $P=0.94$ ; Figure 2).

#### 24 25 26 27 ***Effect of omega-3 fatty acid supplementation on platelet-monocyte aggregation and CD40/CD40*** 28 29 ***ligand***

30  
31 Supplementation with omega-3 fatty acids did not have any effect on platelet-monocyte aggregation,  
32  
33 platelet-neutrophil aggregation, platelet surface expression of P-selectin or CD40L, or monocyte  
34  
35 expression of CD40 (data not shown).  
36  
37  
38  
39  
40  
41  
42  
43  
44  
45  
46  
47  
48  
49  
50  
51  
52  
53  
54  
55  
56  
57  
58  
59  
60

## Discussion

The present study has demonstrated that dietary supplementation with omega-3 fatty acids does not affect endothelial vasomotor function or endothelial t-PA release in patients with coronary heart disease. There is also no effect on markers of platelet or monocyte activation. These findings suggest that any cardiac benefits conferred by omega-3 fatty acids in coronary heart disease are unlikely to be mediated through effects on endothelial function, endogenous fibrinolysis or platelet activation.

We do not believe the lack of effect on outcome measures in the present study is likely to have been due to poor compliance. The assessment of plasma phospholipid fatty acid composition confirmed substantial increases in the percentage of both EPA and DHA during supplementation with omega-3 fatty acids. The dose and duration of therapy with omega-3 fatty acids are also likely to have been appropriate. We used 2 grams per day of omega-3 fatty acids which is similar to the amount shown to reduce mortality in secondary prevention trials.<sup>2,3</sup> Although we cannot exclude an effect with a longer duration of therapy, 6 weeks of supplementation caused a large increase in the plasma phospholipid content of omega-3 fatty acids and has previously been long enough to demonstrate clear effects on vascular function and platelet activation.<sup>20-22</sup>

Omega-3 fatty acids have previously been shown to have inconsistent effects on endothelial function. Whilst some studies have reported beneficial effects in a variety of populations including healthy volunteers,<sup>22</sup> patients with hyperlipidaemia,<sup>21,23</sup> diabetes mellitus,<sup>24</sup> and heart failure,<sup>25</sup> others have not found any improvement.<sup>26-28</sup> Our findings are in contrast to previous studies in coronary heart disease which demonstrated an improvement in endothelial function with omega-3 fatty acids.<sup>20,29-30</sup> These discrepancies could be partly due to differences in study populations or concomitant medication. However, the previous studies were all either not randomized or double-blinded, and lacked a control group or placebo. Indeed, our trial is the first double-blinded, placebo-controlled trial investigating the effect of omega-3 fatty acids on endothelial vasomotor function in coronary heart disease; we therefore believe our study design and findings are likely to be robust.

1  
2  
3  
4  
5 We also found that omega-3 fatty acids did not augment endogenous fibrinolysis in coronary heart  
6 disease. Previous results have varied widely and it has been concluded that omega-3 fatty acids are  
7 unlikely to influence the fibrinolytic system.<sup>31</sup> Whilst some studies have reported a beneficial impact  
8 on fibrinolytic parameters,<sup>32-33</sup> others have found an adverse effect<sup>34</sup> or no effect.<sup>26,35-37</sup> However,  
9 previous studies have only measured basal plasma t-PA concentrations that do not reflect the local  
10 capacity for acute endothelial t-PA release.<sup>9,38</sup> It is the rapid endogenous release of t-PA from the  
11 endothelium which regulates the dissolution of thrombus and is of greater pathophysiological  
12 relevance. We used an established model of acute endothelial t-PA release that predicts cardiovascular  
13 outcome,<sup>19,39</sup> but found no effect of omega-3 fatty acid supplementation on acute endogenous  
14 fibrinolytic capacity in coronary heart disease.  
15  
16  
17  
18  
19  
20  
21  
22  
23  
24

25  
26  
27 There are several possible explanations for the lack of effect omega-3 fatty acids on endothelial  
28 function and endogenous fibrinolysis observed in the present coronary heart disease population. The  
29 patients were all well treated with modern cardio-active medication known to influence endothelial  
30 vasomotor function.<sup>40-41</sup> In contrast, patients in previous studies demonstrating improved endothelial  
31 function<sup>20,29</sup> and cardiac outcomes<sup>2-3</sup> with omega-3 fatty acids were much less likely to be taking  
32 HMG CoA reductase inhibitors or angiotensin-converting enzyme inhibitors. It is conceivable that  
33 endothelial function cannot be further improved by the addition of omega-3 fatty acids in coronary  
34 heart disease patients already treated with modern medical therapy. This possibility is supported by  
35 the most recent large clinical trials which found a low rate of cardiac events in patients on optimal  
36 medical therapy post-myocardial infarction, which could not be improved with omega-3 fatty acid  
37 supplementation.<sup>42-44</sup>  
38  
39  
40  
41  
42  
43  
44  
45  
46  
47  
48  
49

50  
51 However, concomitant medication may not fully explain the neutral effects on endogenous  
52 fibrinolysis. Whilst lipid-lowering therapy improves endothelial vasomotor function, it has not been  
53 found to influence acute t-PA release.<sup>45</sup> Angiotensin-converting enzyme inhibitors only augment  
54 bradykinin induced t-PA release; they do not affect t-PA release stimulated by substance P.<sup>46</sup>  
55  
56  
57  
58  
59  
60

1  
2  
3 Therefore, there may be other factors to explain why omega-3 fatty acid supplementation can improve  
4 endogenous fibrinolytic capacity in healthy cigarette smokers but not in patients with coronary heart  
5 disease. Perhaps the most likely explanation is that the coronary heart disease group was considerably  
6 older and may have a dysfunctional endothelium and fibrinolytic system less responsive to dietary  
7 interventional measures.  
8  
9  
10  
11  
12

13  
14  
15 Circulating platelet-monocyte aggregates are increased in stable coronary heart disease and acute  
16 coronary syndromes, consistent with an important role in both the development of atherosclerotic  
17 lesions and in acute thrombosis.<sup>15</sup> We have previously demonstrated that moderate intake of oil-rich  
18 fish can significantly reduce platelet-monocyte aggregation.<sup>18</sup> However, we did not observe any effect  
19 of omega-3 fatty acid supplements on these measures of platelet and monocyte activation in the  
20 present study. It is possible our previous results were due to another active ingredient in oily fish  
21 rather than omega-3 fatty acids, and we cannot exclude a dose-effect of omega-3 fatty acids on  
22 platelet activation. Omega-3 fatty acids also had no effect on monocyte expression of CD40 or  
23 platelet surface CD40 ligand, consistent with previous studies which found no effect of either omega-  
24 3 fatty acids or dietary fish on soluble CD40 ligand.<sup>18,47</sup>  
25  
26  
27  
28  
29  
30  
31  
32  
33  
34  
35  
36  
37

38 Our study has potential limitations that should be acknowledged. First, the sample size is relatively  
39 small which raises the possibility of a type II error due to lack of power. However, the sample size  
40 was based on separate power calculations for the vascular function and the platelet monocyte studies,  
41 and we have previously detected modest changes in these outcome measures with similar sample  
42 sizes.<sup>17,18</sup> Although it is possible we lacked power to detect very small changes, we believe the study  
43 had sufficient power to detect any clinically relevant effects of omega-3 fatty acids. Secondly, as we  
44 did not measure fatty acids at the beginning of the second treatment stage we cannot fully exclude the  
45 possibility of some carry-over of EPA or DHA into the early placebo phase in the group receiving  
46 omega-3 fatty acids first. However, we feel any such effect would be modest and unlikely to alter the  
47 study outcomes.  
48  
49  
50  
51  
52  
53  
54  
55  
56  
57  
58  
59  
60



### Conclusions

We have demonstrated that omega-3 fatty acid supplementation does not affect endothelial function, endogenous fibrinolytic capacity or markers of platelet and monocyte activation in patients with stable coronary heart disease. A major strength of our study is the use of a robust model to simultaneously assess both endothelial vasomotor tone and endogenous fibrinolysis: two important and complementary measures of vascular function. Our results suggest that any potential cardiac benefits conferred by omega-3 fatty acids in this patient group are unlikely to be mediated by effects on endothelial function or the fibrinolytic system.

For peer review only

## References

1. Din JN, Newby DE, Flapan AD. Omega 3 fatty acids and cardiovascular disease - fishing for a natural treatment. *BMJ* 2004;328:30-5.
2. Burr ML, Fehily AM, Gilbert JF, et al. Effects of changes in fat, fish, and fibre intakes on death and myocardial reinfarction: diet and reinfarction trial (DART). *Lancet* 1989;2:757-61.
3. GISSI-Prevenzione Investigators. Dietary supplementation with n-3 polyunsaturated fatty acids and vitamin E after myocardial infarction: results of the GISSI-Prevenzione trial. Gruppo Italiano per lo Studio della Sopravvivenza nell'Infarto miocardico. *Lancet* 1999;354:447-55.
4. Yokoyama M, Origasa H, Matsuzaki M, et al. Japan EPA lipid intervention study (JELIS) Investigators. *Lancet*. 2007; 369:1090-8.
5. Marchioli R, Barzi F, Bomba E, et al. Early protection against sudden death by n-3 polyunsaturated fatty acids after myocardial infarction: time-course analysis of the results of the Gruppo Italiano per lo Studio della Sopravvivenza nell'Infarto Miocardico (GISSI)-Prevenzione. *Circulation* 2002;105:1897-903
6. Leaf A, Kang JX, Xiao YF, et al. Clinical prevention of sudden cardiac death by n-3 polyunsaturated fatty acids and mechanism of prevention of arrhythmias by n-3 fish oils. *Circulation* 2003;107:2646-52.
7. Brouwer IA, Raitt MH, Dullemeyer C, et al. Effect of fish oil on ventricular tachyarrhythmia in three studies in patients with implantable cardioverter defibrillators. *Eur Heart J* 2009;30:820-6.
8. Bowker TJ, Wood DA, Davies MJ, et al. Sudden, unexpected cardiac or unexplained death in England: a national survey. *QJM*. 2003;96:269-79.
9. Oliver JJ, Webb DJ, Newby DE. Stimulated tissue plasminogen activator release as a marker of endothelial function in humans, *Arterioscler Thromb Vasc Biol* 2005; 25: 2470–2479.
10. Fox KA, Robison AK, Knobb RM et al. Prevention of coronary thrombosis with subthrombolytic doses of tissue type plasminogen activator. *Circulation* 1985; 72:1346-1354.

- 1  
2  
3 11. Jungi TW, Spycher MO, Nydegger UE, et al. Platelet-leukocyte interaction: selective binding of  
4 thrombin-stimulated platelets to human monocytes, polymorphonuclear leukocytes, and related cell  
5 lines. *Blood* 1986;67:629-36.  
6  
7
- 8  
9 12. Schonbeck U, Lippy P. CD40 signaling and plaque instability. *Circ Res.* 2001; 89: 1092–1103  
10
- 11 13. Huo Y, Schober A, Forlow SB, et al. Circulating activated platelets exacerbate atherosclerosis in mice  
12 deficient in apolipoprotein E. *Nat Med* 2003;9:61-7  
13  
14
- 15 14. Zeiher AM, Drexler H, Wollschlager H, et al. Modulation of coronary vasomotor tone in humans:  
16 progressive endothelial dysfunction with different early stages of coronary atherosclerosis. *Circulation*  
17 1991;83:391-401.  
18  
19
- 20 15. Sarma J, Laan CA, Alam S, et al. Increased platelet binding to circulating monocytes in acute coronary  
21 syndromes. *Circulation* 2002; 105: 2166-71.  
22  
23
- 24 16. Tousoulis D, Antoniades C, Nikolopoulou A, et al. Interaction between cytokines and sCD40L in  
25 patients with stable and unstable coronary syndromes. *Eur J Clin Invest.* 2007;37:623-8.  
26  
27
- 28 17. Din JN, Archer RM, Harding SA, et al. Effect of  $\omega$ -3 fatty acid supplementation on endothelial  
29 function, endogenous fibrinolysis and platelet activation in male cigarette smokers. *Heart.* 2013;  
30 99:168-74.  
31  
32
- 33 18. Din JN, Harding SA, Valerio CJ, et al. Dietary intervention with oil rich fish reduces platelet-  
34 monocyte aggregation in man. *Atherosclerosis* 2008;197:290-6.  
35  
36
- 37 19. Newby DE, Wright RA, Ludlam CA, et al. An in vivo model for the assessment of acute fibrinolytic  
38 capacity of the endothelium. *Thromb Haemost.* 1997; 78: 1242–1248  
39  
40
- 41 20. Tagawa H, Shimokawa H, Tagawa T, et al. Long-term treatment with eicosapentaenoic acid augments  
42 both nitric oxide-mediated and non-nitric oxide-mediated endothelium-dependent forearm  
43 vasodilatation in patients with coronary artery disease. *J Cardiovasc Pharmacol.* 1999 Apr;33(4):633-  
44 40.  
45  
46
- 47 21. Mori TA, Watts GF, Burke V, et al. Differential effects of eicosapentaenoic acid and docosahexaenoic  
48 acid on vascular reactivity of the forearm microcirculation in hyperlipidemic, overweight men.  
49  
50  
51  
52  
53  
54  
55  
56  
57  
58  
59  
60  
*Circulation* 2000;102:1264-9.

- 1  
2  
3 22. Chin JP, Gust AP, Nestel PJ, et al. Marine oils dose-dependently inhibit vasoconstriction of forearm  
4 resistance vessels in humans. *Hypertension* 1993;21(1):22-8.  
5  
6  
7 23. Goodfellow J, Bellamy MF, Ramsey MW, et al. Dietary supplementation with marine omega-3  
8 fatty acids improve systemic large artery endothelial function in subjects with  
9 hypercholesterolemia. *J Am Coll Cardiol*. 2000;35:265-70.  
10  
11  
12 24. McVeigh GE, Brennan GM, Johnston GD, et al. Dietary fish oil augments nitric oxide production  
13 or release in patients with type 2 (non-insulin-dependent) diabetes mellitus. *Diabetologia*.  
14 1993;36:33-8.  
15  
16  
17 25. Morgan DR, Dixon LJ, Hanratty CG, et al. Effects of dietary omega-3 fatty acid supplementation  
18 on endothelium-dependent vasodilation in patients with chronic heart failure. *Am J Cardiol*.  
19 2006;97:547-51.  
20  
21  
22 26. Woodman RJ, Mori TA, Burke V, et al. Effects of purified eicosapentaenoic acid and  
23 docosahexaenoic acid on platelet, fibrinolytic and vascular function in hypertensive type 2  
24 diabetic patients. *Atherosclerosis* 2003;166:85-93.  
25  
26  
27 27. Wong CY, Yiu KH, Li SW, et al. Fish-oil supplement has neutral effects on vascular and  
28 metabolic function but improves renal function in patients with Type 2 diabetes mellitus. *Diabet*  
29 *Med* 2010;27:54-60.  
30  
31  
32 28. Skulas-Ray AC, Kris-Etherton PM, Harris WS, et al. Dose-response effects of omega-3 fatty  
33 acids on triglycerides, inflammation, and endothelial function in healthy persons with moderate  
34 hypertriglyceridemia. *Am J Clin Nutr*. 2011;93:243-52.  
35  
36  
37 29. Tagawa T, Hirooka Y, Shimokawa H, et al. Long-term treatment with eicosapentaenoic acid  
38 improves exercise-induced vasodilation in patients with coronary artery disease. *Hypertens Res*.  
39 2002;25:823-9.  
40  
41  
42 30. Haberka M, Mizia-Stec K, Mizia M, et al. N-3 polyunsaturated fatty acids early supplementation  
43 improves ultrasound indices of endothelial function, but not through NO inhibitors in patients with  
44 acute myocardial infarction: N-3 PUFA supplementation in acute myocardial infarction. *Clin Nutr*  
45 2011;30:79-85.  
46  
47  
48  
49  
50  
51  
52  
53  
54  
55  
56  
57  
58  
59  
60

- 1  
2  
3 31. Kristensen SD, Iversen AM, Schmidt EB. n-3 polyunsaturated fatty acids and coronary thrombosis.  
4  
5 *Lipids* 2001;36 Suppl:S79-82.  
6  
7 32. Smith P, Arnesen H, Opstad T, et al. Influence of highly concentrated n-3 fatty acids on serum lipids  
8  
9 and hemostatic variables in survivors of myocardial infarction receiving either oral anticoagulants or  
10  
11 matching placebo. *Thromb Res* 1989;53:467-74.  
12  
13 33. Mehta J, Lawson D, Saldeen TJ. Reduction in plasminogen activator inhibitor-1 (PAI-1) with omega-3  
14  
15 polyunsaturated fatty acid (PUFA) intake. *Am Heart J* 1988;116(5 Pt 1):1201-6.  
16  
17 34. Spannagl M, Drummer C, Fröschl H, et al. Plasmatic factors of haemostasis remain essentially  
18  
19 unchanged except for PAI activity during n-3 fatty acid intake in type I diabetes mellitus. *Blood Coagul*  
20  
21 *Fibrinolysis*. 1991;2:259-65.  
22  
23 35. Finnegan YE, Howarth D, Minihane AM, et al. Plant and marine derived (n-3) polyunsaturated  
24  
25 fatty acids do not affect blood coagulation and fibrinolytic factors in moderately hyperlipidemic  
26  
27 humans. *J Nutr* 2003;133:2210-3.  
28  
29 36. Hellsten G, Boman K, Saarem K, et al. Effects on fibrinolytic activity of corn oil and a fish oil  
30  
31 preparation enriched with omega-3-polyunsaturated fatty acids in a long-term study. *Curr Med Res*  
32  
33 *Opin*. 1993;13:133-9.  
34  
35 37. Toft I, Bønaa KH, Ingebretsen OC, et al. Fibrinolytic function after dietary supplementation with  
36  
37 omega3 polyunsaturated fatty acids. *Arterioscler Thromb Vasc Biol*. 1997;17:814-9.  
38  
39 38. Hrafnkelsdottir T, Gudnason T, Wall U, et al. Regulation of local availability of active tissue-type  
40  
41 plasminogen activator in vivo in man. *J Thromb Haemost* 2004; 2: 1960–8.  
42  
43 39. Robinson SD, Ludlam CA, Boon NA, et al. Endothelial fibrinolytic capacity predicts future adverse  
44  
45 cardiovascular events in patients with coronary heart disease. *Arterioscler Thromb Vasc Biol* 2007; 27:  
46  
47 1651–6.  
48  
49 40. Treasure CB, Klein JL, Weintraub WS, et al. Beneficial effects of cholesterol-lowering therapy on the  
50  
51 coronary endothelium in patients with coronary artery disease. *N Engl J Med* 1995; 332:481–7.  
52  
53 41. Mancini GB, Henry GC, Macaya C, et al. Angiotensin-converting enzyme inhibition with quinapril  
54  
55 improves endothelial vasomotor dysfunction in patients with coronary artery disease: the TREND  
56  
57 (Trial on Reversing ENdothelial Dysfunction) study. *Circulation* 1996; 94: 258–65.  
58  
59  
60

- 1  
2  
3 42. Rauch B, Schiele R, Schneider S, et al. OMEGA Study Group. OMEGA, a randomized, placebo-  
4 controlled trial to test the effect of highly purified omega-3 fatty acids on top of modern guideline-  
5 adjusted therapy after myocardial infarction. *Circulation*. 2010; 122(21):2152-9  
6  
7  
8  
9 43. Galan P, Kesse-Guyot E, Czernichow S, et al. SU.FOL.OM3 Collaborative Group. Effects of B  
10 vitamins and omega 3 fatty acids on cardiovascular diseases: a randomised placebo controlled trial.  
11 *BMJ*. 2010 Nov 29;341:c6273  
12  
13  
14  
15 44. Kromhout D, Giltay EJ, Geleijnse JM; Alpha Omega Trial Group. n-3 fatty acids and cardiovascular  
16 events after myocardial infarction. *N Engl J Med*. 2010; 363:2015-26.  
17  
18  
19 45. Newby DE, Witherow FN, Wright RA, et al. Hypercholesterolaemia and lipid lowering treatment do  
20 not affect the acute endogenous fibrinolytic capacity in vivo. *Heart* 2002; 87: 48 –53.  
21  
22  
23 46. Witherow FN, Dawson P, Ludlam CA, et al E. Marked bradykinin-induced tissue plasminogen  
24 activator release in patients with heart failure maintained on long-term angiotensin-converting enzyme  
25 inhibitor therapy. *J Am Coll Cardiol*. 2002; 40: 961-6.  
26  
27  
28  
29 47. Aarsetoy H, Brugger-Andersen T, Hetland O, et al. Long term influence of regular intake of high dose  
30 n-3 fatty acids on CD40-ligand, pregnancy-associated plasma protein A and matrix metalloproteinase-9  
31 following acute myocardial infarction. *Thromb Haemost* 2006;95:329-36.  
32  
33  
34  
35  
36  
37  
38  
39  
40  
41  
42  
43  
44  
45  
46  
47  
48  
49  
50  
51  
52  
53  
54  
55  
56  
57  
58  
59  
60

## Acknowledgements

We are grateful to the Clinical Research Facility at the Royal Infirmary of Edinburgh.

## Authorship

- 1) Conception and design or analysis and interpretation of data: JD, KL, SH, JS, AF, DN
- 2) Drafting of the manuscript or revising it critically for intellectual content: JD, JS, AF, DN
- 3) Final approval of the manuscript submitted: All authors.

## Funding statement

JD was supported by a British Heart Foundation Project Grant (PG/2003/009). DEN is supported by the British Heart Foundation. The Wellcome Trust Clinical Research Facility is supported by NHS Research Scotland (NRS) through NHS Lothian.

## Competing interests

None.

## Data sharing

No additional unpublished data from this study.

## Figure Legends

**Figure 1.** Effect of omega-3 fatty acid supplementation on absolute forearm blood flow in response to endothelium-dependent and endothelium-independent vasodilators. Statistical analyses two-way ANOVA and Bonferroni's post-tests for multiple comparisons.

**Figure 2.** Net release of plasma t-PA activity with omega-3 fatty acid supplementation and placebo. Statistical analyses two-way ANOVA and Bonferroni's post-tests for multiple comparisons.

For peer review only



**TABLE 1. Baseline Characteristics**

|                                                       |         |
|-------------------------------------------------------|---------|
| Age, years                                            | 53±3    |
| Body mass index, kg/m <sup>2</sup>                    | 28±1    |
| Systolic blood pressure, mm Hg                        | 137±5   |
| Diastolic blood pressure, mm Hg                       | 78±3    |
| Heart rate, beats per minute                          | 60±2    |
| Total cholesterol, mmol/L                             | 4.2±0.2 |
| LDL cholesterol, mmol/L                               | 2.3±0.2 |
| HDL cholesterol, mmol/L                               | 1.1±0.1 |
| Chol:HDL chol ratio                                   | 3.8±0.2 |
| Triacylglycerol, mmol/L                               | 1.6±0.2 |
| Fasting glucose, mmol/l                               | 5.4±0.1 |
| Time from MI, months                                  | 16±4    |
| Revascularization post-MI, %                          | 56%     |
| Current or ex-smoker, %                               | 61%     |
| Hypertension, %                                       | 11%     |
| Diabetes mellitus, %                                  | 0%      |
| Hyperlipidemia, %                                     | 78%     |
| Family history of premature coronary heart disease, % | 33%     |
| Medical therapy                                       |         |
| Aspirin, %                                            | 100%    |
| Clopidogrel, %                                        | 11%     |
| ACE-inhibitor/Angiotensin-receptor blocker, %         | 56%     |
| Beta-blocker %                                        | 78%     |
| Statin, %                                             | 100%    |

Mean±SEM.

**TABLE 2. Effect of omega-3 fatty acid supplementation on plasma phospholipid fatty acid composition**

|                            | Baseline | Omega-3  | Placebo  | <i>P</i> value   |
|----------------------------|----------|----------|----------|------------------|
| Eicosapentaenoic acid, EPA | 2.0±0.2  | 3.7±0.4  | 1.7±0.1  | <i>P</i> <0.0001 |
| Docosahexaenoic acid, DHA  | 4.8±0.3  | 5.6±0.2  | 4.4±0.3  | <i>P</i> <0.0001 |
| Alpha-linolenic acid       | 0.3±0.01 | 0.3±0.02 | 0.3±0.03 | 0.3              |
| Arachidonic acid           | 12.5±0.4 | 11.0±0.3 | 11.6±0.5 | 0.0005           |
| Linoleic acid              | 18.8±0.6 | 19.0±0.6 | 20.0±0.6 | 0.1              |
| Palmitic acid              | 28.2±0.4 | 27.9±0.3 | 28.2±0.3 | 0.6              |
| Stearic acid               | 13.8±0.3 | 14.1±0.2 | 13.9±0.2 | 0.4              |
| Oleic acid                 | 13.3±0.5 | 13.0±0.4 | 13.8±0.5 | 0.1              |

Mean±SEM. Data analysed using 1-way ANOVA. *P* values in the table are for the difference between the three means. *P* values for individual comparisons are below.

EPA: baseline vs omega-3, *P*<0.0001; baseline vs placebo, *P*=NS; omega-3 vs placebo, *P*<0.0001.

DHA: baseline vs omega-3, *P*<0.01; baseline vs placebo, *P*=NS; omega-3 vs placebo, *P*<0.0001.

Arachidonic acid: baseline vs omega-3, *P*<0.001; baseline vs placebo, *P*=0.05; omega-3 vs placebo, *P*=NS.

**TABLE 3. Effect of omega 3 fatty acid supplementation on plasma t-PA activity concentrations**

| Substance P pmol/min                                                           | Omega-3 fatty acids |            |            |            | Placebo    |            |            |            |
|--------------------------------------------------------------------------------|---------------------|------------|------------|------------|------------|------------|------------|------------|
|                                                                                | 0                   | 2          | 4          | 8          | 0          | 2          | 4          | 8          |
| t-PA activity, IU mL <sup>-1</sup>                                             |                     |            |            |            |            |            |            |            |
| Non-infused arm                                                                | 0.39±0.08           | 0.45±0.09  | 0.54±0.12  | 0.64±0.14  | 0.45±0.07  | 0.52±0.08  | 0.60±0.09  | 0.65±0.11  |
| Infused arm                                                                    | 0.38±0.08           | 0.83±0.16  | 1.12±0.23  | 1.67±0.38  | 0.43±0.07  | 0.78±0.10  | 1.09±0.11  | 1.26±0.15  |
| t-PA antigen, ng mL <sup>-1</sup>                                              |                     |            |            |            |            |            |            |            |
| Non-infused arm                                                                | 11.78±1.29          | 12.01±1.0  | 12.69±1.08 | 12.83±1.49 | 13.45±1.40 | 12.93±1.70 | 13.08±1.80 | 12.37±1.27 |
| Infused arm                                                                    | 11.90±1.45          | 13.98±1.33 | 13.63±1.12 | 14.86±1.40 | 12.55±1.10 | 12.85±1.44 | 13.45±1.35 | 13.97±1.55 |
| PAI-1 activity, ng mL <sup>-1</sup>                                            |                     |            |            |            |            |            |            |            |
| Non-infused arm                                                                | 1.77±0.53           | 1.84±0.43  | 1.80±0.42  | 1.64±0.45  | 1.44±0.29  | 1.38±0.26  | 1.39±0.47  | 1.34±0.44  |
| Infused arm                                                                    | 2.33±0.86           | 2.18±0.61  | 2.21±0.69  | 1.92±0.63  | 1.69±0.46  | 1.64±0.41  | 1.54±0.39  | 1.49±0.39  |
| PAI-1 antigen, ng mL <sup>-1</sup>                                             |                     |            |            |            |            |            |            |            |
| Non-infused arm                                                                | 39.51±9.22          | 40.84±7.08 | 39.99±6.62 | 38.48±5.79 | 45.06±7.09 | 43.33±6.45 | 44.41±6.67 | 44.26±7.03 |
| Infused arm                                                                    | 37.64±8.36          | 38.83±6.25 | 41.71±5.74 | 40.26±7.32 | 48.89±8.25 | 42.65±6.59 | 43.12±6.60 | 40.61±6.46 |
| Net t-PA antigen release<br>ng 100 mL <sup>-1</sup> of tissue mm <sup>-1</sup> | 0.23±0.51           | -0.28±4.7  | 3.92±1.8   | 8.41±2.94  | -0.87±1.1  | -0.84±2.82 | 0.94±4.22  | 8.10±3.67  |

Mean±SEM. Data analysed using 2-way ANOVA.

t-PA activity: Dose response  $P<0.0001$ . Omega-3 fatty acids versus placebo;  $P=0.83$  (infused arm).

t-PA antigen: Dose response  $P=0.7$ . Omega-3 fatty acids versus placebo;  $P=0.60$  (infused arm).

PAI-1 activity: Dose response  $P=0.94$ . Omega-3 fatty acids versus placebo;  $P=0.17$  (infused arm).

PAI-1 antigen: Dose response  $P=0.67$ . Omega-3 fatty acids versus placebo;  $P=0.40$  (infused arm).

Net t-PA antigen: Dose response  $P=0.02$ . Omega-3 fatty acids versus placebo;  $P=0.62$  (infused arm)

1  
2  
3  
4  
5  
6  
7  
8  
9  
10  
11  
12  
13  
14  
15  
16  
17  
18  
19  
20  
21  
22  
23  
24  
25  
26  
27  
28  
29  
30  
31  
32  
33  
34  
35  
36  
37  
38  
39  
40  
41  
42  
43  
44  
45  
46  
47  
48  
49  
50  
51  
52  
53  
54  
55  
56  
57  
58  
59  
60

For peer review only

1  
2  
3  
4  
5  
6  
7  
8  
9  
10  
11  
12  
13  
14  
15  
16  
17  
18  
19  
20  
21  
22  
23  
24  
25  
26  
27  
28  
29  
30  
31  
32  
33  
34  
35  
36  
37  
38  
39  
40  
41  
42  
43  
44  
45  
46  
47  
48  
49  
50  
51  
52  
53  
54  
55  
56  
57  
58  
59  
60

Figure 1

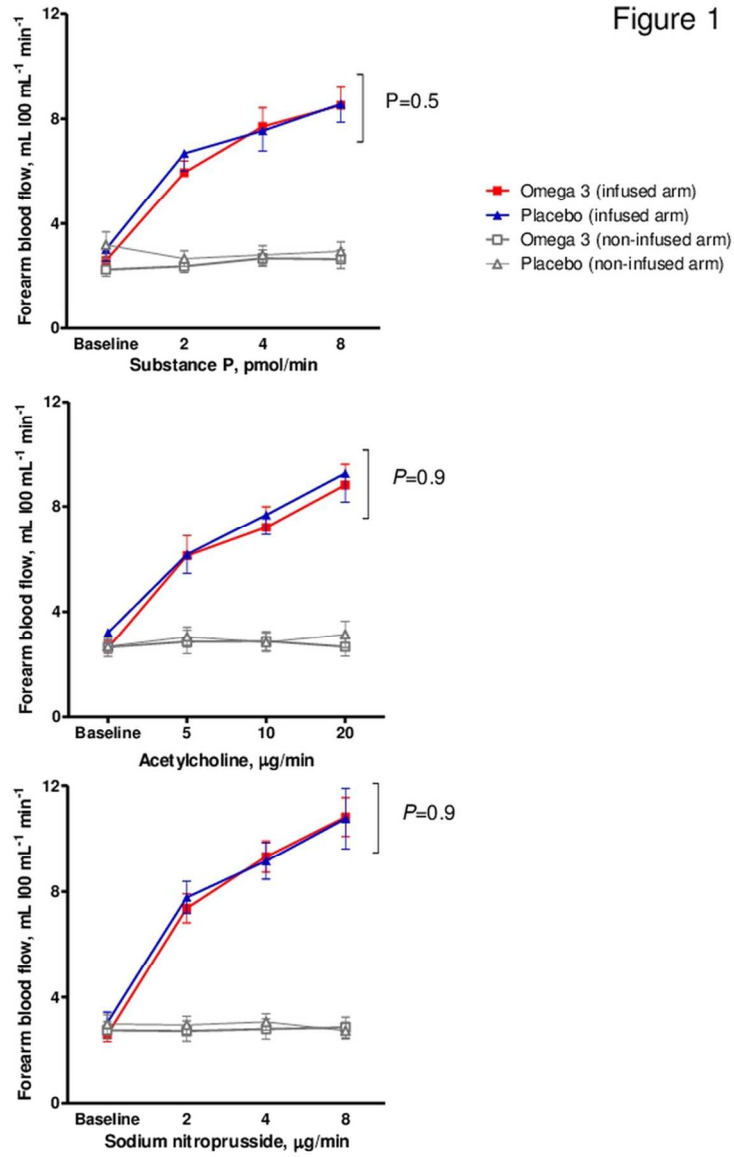

90x119mm (300 x 300 DPI)

1  
2  
3  
4  
5  
6  
7  
8  
9  
10  
11  
12  
13  
14  
15  
16  
17  
18  
19  
20  
21  
22  
23  
24  
25  
26  
27  
28  
29  
30  
31  
32  
33  
34  
35  
36  
37  
38  
39  
40  
41  
42  
43  
44  
45  
46  
47  
48  
49  
50  
51  
52  
53  
54  
55  
56  
57  
58  
59  
60

Figure 2

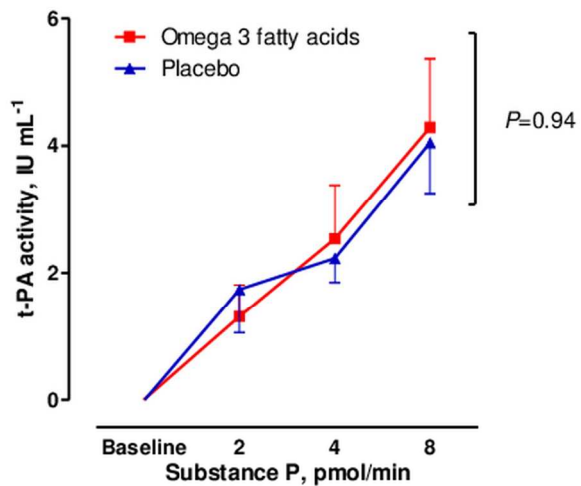

186x139mm (300 x 300 DPI)

ew only

1  
2  
3  
4  
5  
6 **EFFECT OF OMEGA 3 FATTY ACID SUPPLEMENTATION ON ENDOTHELIAL FUNCTION,**  
7 **ENDOGENOUS FIBRINOLYSIS AND PLATELET ACTIVATION IN PATIENTS WITH A**  
8 **PREVIOUS MYOCARDIAL INFARCTION: A RANDOMISED CONTROLLED TRIAL**  
9  
10

11  
12  
13  
14 Jehangir N Din<sup>1</sup>, Jaydeep Sarma<sup>2</sup>, Scott A Harding<sup>3</sup>, Karin Lyall<sup>1</sup>, David E Newby<sup>1</sup>, Andrew D Flapan<sup>4</sup>  
15  
16

17  
18 <sup>1</sup>Centre for Cardiovascular Sciences, University of Edinburgh, Chancellor's Building, 49 Little France Crescent,  
19 Edinburgh EH16 4SB, United Kingdom; <sup>2</sup>North West Heart Centre, Wythenshawe Hospital, Manchester, United  
20 Kingdom; <sup>3</sup>Department of Cardiology, Wellington Hospital, Wellington, New Zealand; and <sup>4</sup>Edinburgh Heart  
21 Centre, Royal Infirmary of Edinburgh, Edinburgh, United Kingdom.  
22  
23  
24

25  
26  
27 WORD COUNT 2801  
28

29 ClinicalTrials.gov Identifier: NCT01888211  
30  
31

32  
33 KEY WORDS  
34

35 Omega 3 fatty acids, endothelial function, endogenous fibrinolysis, platelet activation,  
36  
37

38  
39 AUTHOR FOR CORRSPONDENCE

40 Dr Jehangir N Din  
41

42 University of Edinburgh  
43

44 The Chancellor's Building  
45

46 49 Little France Crescent  
47

48 Edinburgh EH16 4SB  
49

50 UNITED KINGDOM  
51

52 Telephone: +44 131 242 1850  
53

54 Fax: +44 131 242 6422  
55

56 E-mail: [jehangirdin@hotmail.com](mailto:jehangirdin@hotmail.com)  
57  
58  
59  
60

## Abstract

**Objective** – The mechanisms through which omega-3 fatty acids reduce adverse cardiac events remain uncertain. We aimed to investigate the effect of omega-3 fatty acid supplementation on endothelial vasomotor function, endogenous fibrinolysis, and platelet and monocyte activation in patients with coronary heart disease.

**Design** – Randomised, double-blind, placebo-controlled, crossover trial.

**Setting** – Academic cardiac centre.

**Participants** - Twenty male patients with a previous myocardial infarction.

**Intervention** - Omega-3 fatty acid supplementation (2g/day for 6-weeks) versus olive oil placebo.

**Outcome measures** - Peripheral blood was taken for analysis of platelet and monocyte activation, and forearm blood flow was assessed in a subset of 12 patients during intrabrachial infusions of acetylcholine, substance P and sodium nitroprusside. Stimulated plasma tissue plasminogen activator (t-PA) concentrations were measured during substance P infusion.

**Results** - All vasodilators caused dose-dependent increases in forearm blood flow ( $P<0.0001$ ). Omega-3 fatty acid supplementation did not affect endothelium-dependent vasodilatation with acetylcholine and substance P compared with placebo ( $P=0.5$  and  $P=0.9$ ). Substance P caused a dose-dependent increase in plasma t-PA concentrations ( $P<0.0001$ ), which was not affected by omega-3 fatty acid supplementation ( $P=0.9$ ). Omega-3 fatty acids did not affect platelet-monocyte aggregation, platelet P-selectin or CD40L, or monocyte CD40.

**Conclusions** – We have demonstrated that dietary supplementation with omega-3 fatty acids does not affect endothelial vasomotor function, endothelial t-PA release or platelet and monocyte activation in patients with coronary heart disease. Cardiac benefits conferred by omega-3 fatty acids in coronary heart disease are unlikely to be mediated through effects on these systems.



## Article Summary

### Article focus

- The mechanisms through which omega-3 fatty acids may reduce adverse cardiac events remain uncertain.
- We have previously demonstrated that omega-3 fatty acids improve endothelial function and endogenous fibrinolysis in healthy cigarette smokers.
- The present study investigated the effect of omega-3 fatty acid supplementation on endothelial vasomotor function, endogenous fibrinolysis, and platelet and monocyte activation in patients with coronary heart disease.

### Key messages

- Omega-3 fatty acid supplementation did not affect endothelium-dependent vasodilatation, acute tPA release, or platelet and monocyte activation in patients with coronary heart disease.
- Any potential cardiac benefits conferred by omega-3 fatty acids in this patient group are unlikely to be mediated by effects on endothelial function, the endogenous fibrinolytic system, or platelet activation.

### Strengths and limitations of this study

- Randomised, double-blind, placebo-controlled crossover design.
- Use of an established and robust model to simultaneously assess both endothelial vasomotor tone and endogenous fibrinolysis: two important and complementary measures of vascular function.
- Limitations: modest sample size.

## Funding statement

JD was supported by a British Heart Foundation Project Grant (PG/2003/009). DEN is supported by the British Heart Foundation. The Wellcome Trust Clinical Research Facility is supported by NHS Research Scotland (NRS) through NHS Lothian.

## Competing interests

None.

For peer review only

## Introduction

Dietary fish or fish oil supplements containing omega-3 fatty acids may protect against cardiovascular disease.<sup>1</sup> Clinical trials have demonstrated beneficial effects on mortality or cardiac events in patients with coronary heart disease.<sup>2-4</sup> However, the mechanisms through which they confer **any** cardiac benefits are uncertain. Although an effect on ventricular arrhythmias has been thought to be important due to an observed reduction in sudden death,<sup>5,6</sup> subsequent studies have failed to clearly demonstrate an anti-arrhythmic effect.<sup>7</sup> An alternative mechanism may therefore be an effect on the vascular endothelium, as acute myocardial infarction due to plaque rupture and subsequent coronary thrombosis remains the most common cause of sudden cardiac death.<sup>8</sup>

The endothelium regulates vascular tone and blood flow, and mediates thrombosis through the production of factors that influence fibrinolysis and platelet activation. The endogenous fibrinolytic system is responsible for the dissolution of arterial thrombi and is regulated by the endothelium-derived profibrinolytic factor, tissue plasminogen activator (t-PA), and its inhibitor, plasminogen-activator inhibitor type 1 (PAI-1).<sup>9</sup> The rapid release of t-PA from the endothelium is vital, with thrombus dissolution being more effective if t-PA is incorporated early during thrombus formation.<sup>10</sup>

Endothelial cells regulate thrombosis through the release of paracrine factors that mediate platelet function. Activated platelets can bind to leukocytes via a P-selectin dependent mechanism,<sup>11</sup> and these interactions can also be modulated by the CD40 receptor and its ligand.<sup>12</sup> Formation of platelet-leukocyte aggregates or ligation of CD40 can mediate an array of proinflammatory and prothrombotic effects, thereby contributing to endothelial injury and atherothrombosis.<sup>13</sup>

Patients with coronary heart disease demonstrate impaired endothelial function,<sup>14</sup> in addition to increased platelet-monocyte aggregation and upregulation of the CD40/CD40 ligand system.<sup>15,16</sup> We have recently demonstrated that omega-3 fatty acid supplements improve endogenous fibrinolysis and endothelial function in healthy cigarette smokers, a group at high risk of adverse cardiac events.<sup>17</sup>

1  
2  
3 Previously, we have shown that dietary fish intake reduces platelet-monocyte aggregation in man.<sup>18</sup>

4  
5 We therefore hypothesized that omega-3 fatty acid supplementation would improve endothelial  
6  
7 vasomotor function, endogenous fibrinolysis, and markers of platelet and monocyte activation in  
8  
9 patients with coronary heart disease.  
10  
11  
12  
13  
14  
15  
16  
17  
18  
19  
20  
21  
22  
23  
24  
25  
26  
27  
28  
29  
30  
31  
32  
33  
34  
35  
36  
37  
38  
39  
40  
41  
42  
43  
44  
45  
46  
47  
48  
49  
50  
51  
52  
53  
54  
55  
56  
57  
58  
59  
60

For peer review only

## Methods

### *Study participants*

Twenty patients with a myocardial infarction at least three months previously were recruited to participate in the study. Myocardial infarction was defined as any two of: typical clinical history, electrocardiographic changes (Q waves in 2 contiguous leads) or elevation of cardiac markers (CKmB or troponin). All subjects gave written informed consent and the study was undertaken with the approval of the local research ethics committee and in accordance with the Declaration of Helsinki. Exclusion criteria included dietary fish allergy or intolerance, consumption of > 1 fish meal per week, renal or hepatic failure, or any intercurrent illness likely to be associated with an inflammatory response. **The first patient was randomised in December 2004 and the last study visit took place in June 2006. There were logistical delays in the analysis of frozen plasma samples and the final data became available for analysis in June 2009.**

### *Study design*

This was a prospective, double-blind, placebo-controlled, randomized crossover trial. Subjects were randomized to receive either omega-3 fatty acid supplements (2 g/day, Omacor capsules, Pronova, Norway) or matching placebo capsules (2 g/day olive oil capsules, Eurocaps Limited, Gwent) for a 6-week period. After a 4-week washout phase, participants crossed over to the opposite treatment arm for a further 6-week period. **The omega 3 fatty acid supplements and placebo were packaged and dispensed in identical containers by the Royal Infirmary of Edinburgh Pharmacy. All study participants and investigators were blinded to the study allocation. The randomization schedule was generated by an investigator not involved in the study, and securely kept in the Royal Infirmary of Edinburgh Pharmacy.** The omega-3 fatty acid capsules contained 85-88% eicosapentaenoic acid (EPA) and docosahexaenoic acid (DHA) as ethyl esters in a ratio of 1.2:1. Both the omega-3 fatty acid capsules and olive oil placebo contained 4 mg  $\alpha$ -tocopherol. All 20 subjects had peripheral blood taken for fasting lipid profile, plasma fatty acid analysis and flow cytometric analysis of platelet activation at baseline and at the end of each treatment period. Two patients dropped out of the study:

1  
2  
3  
4  
5  
6  
7  
8  
9  
10  
11  
12  
13  
14  
15  
16  
17  
18  
19  
20  
21  
22  
23  
24  
25  
26  
27  
28  
29  
30  
31  
32  
33  
34  
35  
36  
37  
38  
39  
40  
41  
42  
43  
44  
45  
46  
47  
48  
49  
50  
51  
52  
53  
54  
55  
56  
57  
58  
59  
60

one was withdrawn after being admitted with unstable angina and a second patient was lost to follow-up. A subset of 12 participants also underwent measurement of forearm blood flow and endogenous fibrinolysis at the end of each treatment period.

For peer review only

### ***Blood collection protocol***

Peripheral venous blood was drawn from a large antecubital vein with a 19-gauge needle and anticoagulated with ethylene diamine tetra-acetic acid (EDTA; 1.6 mg/mL, Sarstedt Monovette) and the direct thrombin inhibitor D-Phenylalanine-L-prolyl-L-arginine chloromethyl ketone (75 µM, PPACK, Cambridge Biosciences). Whole blood anticoagulated with PPACK was immunolabelled within 5 min of phlebotomy for subsequent flow cytometric analysis. Plasma was prepared from blood anticoagulated with sodium EDTA by centrifugation (1500 x g for 30 min). Plasma samples were stored at -70°C until analysis.

### ***Flow cytometry***

The following reagents were used: fluorescein isothiocyanate (FITC)-conjugated CD42a (GRP-P, IgG1), FITC-conjugated CD14 (UCHM1, IgG2a), phycoerythrin (PE)-conjugated CD40 (LOB7/6, IgG1), and their appropriate isotype controls (Serotec Ltd; Oxford, UK) as well as PE-conjugated CD154 (TRAP1, IgG1), PE-conjugated CD14 (Tuk-4, IgG2a), PE-conjugated CD 62P (IE3, IgG2a), and their appropriate isotype controls (Dako Cytomation; Buckinghamshire, UK) and FACS-Lyse (Becton-Dickinson; Cowley, UK). Aliquots of whole blood (60 µL) anticoagulated with PPACK were incubated with appropriate antibodies and their isotype matched controls for 20 min at room temperature. To evaluate platelet-monocyte aggregates and CD40 on monocytes, samples were fixed and red cells lysed by the addition of 500 µL of FACS-Lyse solution. To evaluate platelet surface P-selectin and CD40 ligand, samples were fixed with 1% paraformaldehyde. Samples were analysed using a Coulter EPICS XL flow cytometer equipped with a 488 nm wavelength laser (Beckman Coulter, High Wycombe, UK) within 6 hours of labelling. Monocytes and platelets were identified by gating for CD14 and CD42a positive cells respectively. Platelet-monocyte aggregates were defined as monocytes positive for CD42a. Analyses were performed using EXPO 32 software (Beckman Coulter, High Wycombe, UK).

### *Plasma fatty acid analysis*

The fatty acid composition of plasma phospholipids was determined from blood anticoagulated with EDTA. Total lipids were recovered from 500  $\mu$ L of plasma using dichloro-metane-metanol (2:1) containing 0.005% butyrate hydroxytoluene as an antioxidant (Folch extraction). Phospholipids were isolated by solid-phase extraction using aminopropyl silica columns (IST International), and fatty acids converted into methyl esters by transmethylation with 0.5 M sodium methoxide. Fatty acid methyl ester analysis was performed with an HP-INNOWAX capillary column (Agilent Technologies). Peaks were identified by comparison of retention times with known fatty acid methyl ester standards and quantified using an internal standard. Plasma total phospholipid fatty acids were expressed as the individual fractions of fatty acids and fatty acid groups as relative values (% of total fatty acids). The mean coefficient of variation for the assay was 2.4%

### *Vascular studies*

Studies were carried out in a quiet temperature controlled room (22–25 °C). Subjects fasted for 6 h prior to the study and avoided caffeine and alcohol for the preceding 24 h. Blood pressure and heart rate were recorded throughout the study using a semi-automated non-invasive oscillometric sphygmomanometer (OMRON 705 IT, Kyoto, Japan).

All subjects underwent brachial artery cannulation with a 27-standard wire gauge steel needle under controlled conditions. After a 30-min baseline saline infusion, acetylcholine at 5, 10, and 20  $\mu$ g/min (endothelium-dependent vasodilator that does not release t-PA; Merck Biosciences), substance P at 2, 4, and 8 pmol/min (endothelium-dependent vasodilator that releases t-PA; Clinalfa, Switzerland) and sodium nitroprusside at 2, 4, and 8  $\mu$ g/min (endothelium-independent vasodilator that does not release t-PA; David Bull Laboratories) were infused for 6 min at each dose. The 3 vasodilators were separated by 20-min saline infusions and given in a randomized order.

Forearm blood flow (FBF) was measured in infused and non-infused arms by venous occlusion plethysmography with mercury-in-silicone elastomer strain gauges as described previously.<sup>19</sup> Venous



1  
2  
3 cannulas (17-gauge) were inserted into large subcutaneous veins of the antecubital fossae of both  
4 arms. Blood (10 mL) was withdrawn simultaneously from each arm at baseline and during infusion of  
5 each dose of substance P and collected into acidified buffered citrate (Stabilyte tubes, Biopool  
6 International; for t-PA assays) and into citrate (BD Vacutainer; for PAI-1 assays). Samples were kept  
7 on ice before being centrifuged at 2000 g for 30 min at 4°C. Platelet-free plasma was decanted and  
8 stored at -80°C before assay. Plasma t-PA antigen and activity (t-PA Combi Actibind Elisa Kit;  
9 Technoclone, Vienna, Austria) and PAI-1 antigen and activity (Elitest PAI-1 Antigen and Zymutest  
10 PAI-1 Activity; Hyphen Biomed, Neuville-Sur-Oise, France) concentrations were determined by  
11 enzyme-linked immunosorbent assays. Haematocrit was determined by capillary tube centrifugation at  
12 baseline.  
13  
14  
15  
16  
17  
18  
19  
20  
21  
22  
23  
24

#### 25 ***Data analysis and statistical methods***

26  
27 Continuous variables are reported as mean  $\pm$  standard error of the mean. The pre-specified primary  
28 endpoint was endothelial vasomotor and fibrinolytic function. The sample size of n=12 was based on  
29 power calculations derived from previous studies giving 90% power to detect a 17% difference in the  
30 mean t-PA release at a significance level of 5%.<sup>19</sup> The pre-specified secondary endpoint was platelet  
31 and monocyte activation. The sample size of n=20 was based on power calculations derived from  
32 previous studies, giving 90% power to detect a 5% difference in mean platelet-monocyte aggregation  
33 at a significance level of 5%. Forearm plethysmographic data were analyzed as described  
34 previously.<sup>17</sup> Estimated net release of plasma t-PA, has been defined previously as the product of the  
35 infused forearm plasma flow (based on the mean hematocrit and the infused forearm blood flow) and  
36 the concentration difference between the infused and noninfused arms.<sup>19</sup> Statistical analyses were  
37 performed using one-way and two-way ANOVA with Bonferroni's post-tests for multiple  
38 comparisons where appropriate. The statistical methods for each analysis are detailed in the relevant  
39 Figure and Table legends. All calculations were performed using GraphPad Prism (Graph Pad  
40 Software).  
41  
42  
43  
44  
45  
46  
47  
48  
49  
50  
51  
52  
53  
54  
55  
56  
57  
58  
59  
60

## Results

### *Baseline characteristics*

Participant flow through the study including a CONSORT diagram is included in the Supplementary File. Patients were relatively young and well treated in terms of blood pressure control and lipid profile (Table 1). The mean and median times from myocardial infarction were 12 months and 16 months, respectively. Patients were on standard medical therapy including aspirin, beta-blockers, statins and ACE-inhibitors, and over half had undergone revascularization post-MI.

### *Effect of omega 3 fatty acid supplementation on plasma phospholipid fatty acid composition*

Dietary supplementation with omega-3 fatty acids led to a marked increase in EPA as a percentage of plasma phospholipids compared with both baseline ( $3.7\pm 0.4\%$  versus  $2.0\pm 0.2\%$ ,  $P<0.0001$ ) and placebo ( $3.7\pm 0.4\%$  versus  $1.7\pm 0.1\%$ ,  $P<0.0001$ ; Table 2). There was also an increase in DHA compared with baseline ( $5.6\pm 0.2\%$  versus  $4.8\pm 0.3\%$ ,  $P<0.01$ ) and placebo ( $5.6\pm 0.2\%$  versus  $4.4\pm 0.3\%$ ,  $P<0.0001$ ; Table 2). We did not detect any carry-over of EPA or DHA after 6 weeks of placebo in the group who had omega-3 fatty acids first (data not shown). There was a reduction in the plasma phospholipid percentage of arachidonic acid, but no effect on alpha-linolenic acid, linoleic acid, palmitic acid, stearic acid or oleic acid with either omega-3 fatty acid supplements or olive oil placebo (Table 2).

### *Effect of omega 3 fatty acid supplementation on lipid profile*

Supplementation for 6 weeks with omega 3 fatty acids did not affect total cholesterol, low-density lipoprotein cholesterol, high-density lipoprotein cholesterol or triglycerides (data not shown).

### *Effect of omega 3 fatty acid supplementation on vasomotor function*

Omega-3 fatty acid supplementation did not have any effect on systolic blood pressure, diastolic blood pressure or heart rate compared with placebo (data not shown). During forearm vascular studies substance P, acetylcholine, and sodium nitroprusside led to a dose-dependent increase in absolute

1  
2  
3 forearm blood flow ( $P<0.0001$  for all). Compared with placebo, omega-3 fatty acid supplementation  
4 did not affect endothelium-dependent vasodilatation in response to acetylcholine ~~and~~ or substance P  
5 ( $P=0.5$  and  $P=0.9$ ; **Figure 1**), or endothelium-independent vasodilatation with sodium nitroprusside  
6 ( $P=0.9$ ; **Figure 1**).  
7  
8  
9

#### 10 11 12 13 ***Effect of omega-3 fatty acid supplementation on stimulated t-PA activity***

14  
15 Substance P infusion caused a dose-dependent increase in plasma t-PA activity concentrations after  
16 both omega-3 fatty acid supplementation and placebo ( $P<0.0001$ ; **Table 3**). Omega-3 fatty acid  
17 supplementation did not affect plasma TPA activity, TPA antigen or PAI-1 concentrations compared  
18 with placebo (**Table 3**). There was no difference in net release of t-PA activity after omega-3 fatty  
19 acid supplementation compared with placebo ( $P=0.94$ ; **Figure 2**).  
20  
21  
22  
23  
24  
25  
26

#### 27 ***Effect of omega-3 fatty acid supplementation on platelet-monocyte aggregation and CD40/CD40*** 28 ***ligand***

29  
30  
31 Supplementation with omega-3 fatty acids did not have any effect on platelet-monocyte aggregation,  
32 platelet-neutrophil aggregation, platelet surface expression of P-selectin or CD40L, or monocyte  
33 expression of CD40 (**data not shown**).  
34  
35  
36  
37  
38  
39  
40  
41  
42  
43  
44  
45  
46  
47  
48  
49  
50  
51  
52  
53  
54  
55  
56  
57  
58  
59  
60

## Discussion

The present study has demonstrated that dietary supplementation with omega-3 fatty acids does not affect endothelial vasomotor function or endothelial t-PA release in patients with coronary heart disease. There is also no effect on markers of platelet or monocyte activation. These findings suggest that any cardiac benefits conferred by omega-3 fatty acids in coronary heart disease are unlikely to be mediated through effects on endothelial function, endogenous fibrinolysis or platelet activation.

We do not believe the lack of effect on outcome measures in the present study is likely to have been due to poor compliance. The assessment of plasma phospholipid fatty acid composition confirmed substantial increases in the percentage of both EPA and DHA during supplementation with omega-3 fatty acids. The dose and duration of therapy with omega-3 fatty acids are also likely to have been appropriate. We used 2 grams per day of omega-3 fatty acids which is similar to the amount shown to reduce mortality in secondary prevention trials.<sup>2,3</sup> Although we cannot exclude an effect with a longer duration of therapy, 6 weeks of supplementation caused a large increase in the plasma phospholipid content of omega-3 fatty acids and has previously been long enough to demonstrate clear effects on vascular function and platelet activation.<sup>20-22</sup>

Omega-3 fatty acids have previously been shown to have inconsistent effects on endothelial function. Whilst some studies have reported beneficial effects in a variety of populations including healthy volunteers,<sup>22</sup> patients with hyperlipidaemia,<sup>21,23</sup> diabetes mellitus,<sup>24</sup> and heart failure,<sup>25</sup> others have not found any improvement.<sup>26-28</sup> Our findings are in contrast to previous studies in coronary heart disease which demonstrated an improvement in endothelial function with omega-3 fatty acids.<sup>20,29-30</sup> These discrepancies could be partly due to differences in study populations or concomitant medication. However, the previous studies were all either not randomized or double-blinded, and lacked a control group or placebo. Indeed, our trial is the first double-blinded, placebo-controlled trial investigating the effect of omega-3 fatty acids on endothelial vasomotor function in coronary heart disease; we therefore believe our study design and findings are likely to be robust.

1  
2  
3  
4  
5 We also found that omega-3 fatty acids did not augment endogenous fibrinolysis in coronary heart  
6 disease. Previous results have varied widely and it has been concluded that omega-3 fatty acids are  
7 unlikely to influence the fibrinolytic system.<sup>31</sup> Whilst some studies have reported a beneficial impact  
8 on fibrinolytic parameters,<sup>32-33</sup> others have found an adverse effect<sup>34</sup> or no effect.<sup>26,35-37</sup> However,  
9 previous studies have only measured basal plasma t-PA concentrations that do not reflect the local  
10 capacity for acute endothelial t-PA release.<sup>9,38</sup> It is the rapid endogenous release of t-PA from the  
11 endothelium which regulates the dissolution of thrombus and is of greater pathophysiological  
12 relevance. We used an established model of acute endothelial t-PA release that predicts cardiovascular  
13 outcome,<sup>19,39</sup> but found no effect of omega-3 fatty acid supplementation on acute endogenous  
14 fibrinolytic capacity in coronary heart disease.  
15  
16  
17  
18  
19  
20  
21  
22  
23  
24

25  
26  
27 There are several possible explanations for the lack of effect omega-3 fatty acids on endothelial  
28 function and endogenous fibrinolysis observed in the present coronary heart disease population. The  
29 patients were all well treated with modern cardio-active medication known to influence endothelial  
30 vasomotor function.<sup>40-41</sup> In contrast, patients in previous studies demonstrating improved endothelial  
31 function<sup>20,29</sup> and cardiac outcomes<sup>2-3</sup> with omega-3 fatty acids were much less likely to be taking  
32 HMG CoA reductase inhibitors or angiotensin-converting enzyme inhibitors. It is conceivable that  
33 endothelial function cannot be further improved by the addition of omega-3 fatty acids in coronary  
34 heart disease patients already treated with modern medical therapy. This possibility is supported by  
35 the most recent large clinical trials which found a low rate of cardiac events in patients on optimal  
36 medical therapy post-myocardial infarction, which could not be improved with omega-3 fatty acid  
37 supplementation.<sup>42-44</sup>  
38  
39  
40  
41  
42  
43  
44  
45  
46  
47  
48  
49

50  
51 However, concomitant medication may not fully explain the neutral effects on endogenous  
52 fibrinolysis. Whilst lipid-lowering therapy improves endothelial vasomotor function, it has not been  
53 found to influence acute t-PA release.<sup>45</sup> Angiotensin-converting enzyme inhibitors only augment  
54 bradykinin induced t-PA release; they do not affect t-PA release stimulated by substance P.<sup>46</sup>  
55  
56  
57  
58  
59  
60

1  
2  
3 Therefore, there may be other factors to explain why omega-3 fatty acid supplementation can improve  
4 endogenous fibrinolytic capacity in healthy cigarette smokers but not in patients with coronary heart  
5 disease. Perhaps the most likely explanation is that the coronary heart disease group was considerably  
6 older and may have a dysfunctional endothelium and fibrinolytic system less responsive to dietary  
7 interventional measures.  
8  
9  
10  
11  
12

13  
14  
15 Circulating platelet-monocyte aggregates are increased in stable coronary heart disease and acute  
16 coronary syndromes, consistent with an important role in both the development of atherosclerotic  
17 lesions and in acute thrombosis.<sup>15</sup> We have previously demonstrated that moderate intake of oil-rich  
18 fish can significantly reduce platelet-monocyte aggregation.<sup>18</sup> However, we did not observe any effect  
19 of omega-3 fatty acid supplements on these measures of platelet and monocyte activation in the  
20 present study. It is possible our previous results were due to another active ingredient in oily fish  
21 rather than omega-3 fatty acids, and we cannot exclude a dose-effect of omega-3 fatty acids on  
22 platelet activation. Omega-3 fatty acids also had no effect on monocyte expression of CD40 or  
23 platelet surface CD40 ligand, consistent with previous studies which found no effect of either omega-  
24 3 fatty acids or dietary fish on soluble CD40 ligand.<sup>18,47</sup>  
25  
26  
27  
28  
29  
30  
31  
32  
33  
34  
35  
36  
37

38 Our study has potential limitations that should be acknowledged. First, the sample size is relatively  
39 small which raises the possibility of a type II error due to lack of power. However, the sample size  
40 was based on separate power calculations for the vascular function and the platelet monocyte studies,  
41 and we have previously detected modest changes in these outcome measures with similar sample  
42 sizes.<sup>17,18</sup> Although it is possible we lacked power to detect very small changes, we believe the study  
43 had sufficient power to detect any clinically relevant effects of omega-3 fatty acids. Secondly, as we  
44 did not measure fatty acids at the beginning of the second treatment stage we cannot fully exclude the  
45 possibility of some carry-over of EPA or DHA into the early placebo phase in the group receiving  
46 omega-3 fatty acids first. However, we feel any such effect would be modest and unlikely to alter the  
47 study outcomes.  
48  
49  
50  
51  
52  
53  
54  
55  
56  
57  
58  
59  
60

### Conclusions

We have demonstrated that omega-3 fatty acid supplementation does not affect endothelial function, endogenous fibrinolytic capacity or markers of platelet and monocyte activation in patients with stable coronary heart disease. A major strength of our study is the use of a robust model to simultaneously assess both endothelial vasomotor tone and endogenous fibrinolysis: two important and complementary measures of vascular function. Our results suggest that any potential cardiac benefits conferred by omega-3 fatty acids in this patient group are unlikely to be mediated by effects on endothelial function or the fibrinolytic system.

## References

1. Din JN, Newby DE, Flapan AD. Omega 3 fatty acids and cardiovascular disease - fishing for a natural treatment. *BMJ* 2004;328:30-5.
2. Burr ML, Fehily AM, Gilbert JF, et al. Effects of changes in fat, fish, and fibre intakes on death and myocardial reinfarction: diet and reinfarction trial (DART). *Lancet* 1989;2:757-61.
3. GISSI-Prevenzione Investigators. Dietary supplementation with n-3 polyunsaturated fatty acids and vitamin E after myocardial infarction: results of the GISSI-Prevenzione trial. Gruppo Italiano per lo Studio della Sopravvivenza nell'Infarto miocardico. *Lancet* 1999;354:447-55.
4. Yokoyama M, Origasa H, Matsuzaki M, Matsuzawa Y, Saito Y, Ishikawa Y, Oikawa S, Sasaki J, Hishida H, Itakura H, Kita T, Kitabatake A, Nakaya N, Sakata T, Shimada K, Shirato K; Japan EPA lipid intervention study (JELIS) Investigators. *Lancet*. 2007; 369:1090-8.
5. Marchioli R, Barzi F, Bomba E, Chieffo C, Di Gregorio D, Di Mascio R, et al. Early protection against sudden death by n-3 polyunsaturated fatty acids after myocardial infarction: time-course analysis of the results of the Gruppo Italiano per lo Studio della Sopravvivenza nell'Infarto Miocardico (GISSI)-Prevenzione. *Circulation* 2002;105:1897-903
6. Leaf A, Kang JX, Xiao YF, Billman GE. Clinical prevention of sudden cardiac death by n-3 polyunsaturated fatty acids and mechanism of prevention of arrhythmias by n-3 fish oils. *Circulation* 2003;107:2646-52.
7. Brouwer IA, Raitt MH, Dullemeyer C, Kraemer DF, Zock PL, Morris C, Katan MB, Connor WE, Camm JA, Schouten EG, McNulty J. Effect of fish oil on ventricular tachyarrhythmia in three studies in patients with implantable cardioverter defibrillators. *Eur Heart J* 2009;30:820-6.
8. Bowker TJ, Wood DA, Davies MJ, Sheppard MN, Cary NR, Burton JD, Chambers DR, Dawling S, Hobson HL, Pyke SD, Riemersma RA, Thompson SG. Sudden, unexpected cardiac or unexplained death in England: a national survey. *QJM*. 2003;96:269-79.
9. Oliver JJ, Webb DJ, Newby DE. Stimulated tissue plasminogen activator release as a marker of endothelial function in humans, *Arterioscler Thromb Vasc Biol* 2005; 25: 2470–2479.



10. Fox KA, Robison AK, Knobb RM *et al.* Prevention of coronary thrombosis with subthrombolytic doses of tissue type plasminogen activator. *Circulation* 1985; 72:1346-1354.
11. Jungi TW, Spycher MO, Nydegger UE, Barandun S. Platelet-leukocyte interaction: selective binding of thrombin-stimulated platelets to human monocytes, polymorphonuclear leukocytes, and related cell lines. *Blood* 1986;67:629-36.
12. Schonbeck U, Lippy P. CD40 signaling and plaque instability. *Circ Res.* 2001; 89: 1092–1103
13. Huo Y, Schober A, Forlow SB, et al. Circulating activated platelets exacerbate atherosclerosis in mice deficient in apolipoprotein E. *Nat Med* 2003;9:61-7
14. Zeiher AM, Drexler H, Wollschlager H, Just H. Modulation of coronary vasomotor tone in humans: progressive endothelial dysfunction with different early stages of coronary atherosclerosis. *Circulation* 1991;83:391-401.
15. Sarma J, Laan CA, Alam S, Jha A, Fox KA, Dransfield I. Increased platelet binding to circulating monocytes in acute coronary syndromes. *Circulation* 2002; 105: 2166-71.
16. Tousoulis D, Antoniades C, Nikolopoulou A, Koniari K, Vasiliadou C, Marinou K, Koumallos N, Papageorgiou N, Stefanadi E, Siasos G, Stefanadis C. Interaction between cytokines and sCD40L in patients with stable and unstable coronary syndromes. *Eur J Clin Invest.* 2007;37:623-8.
17. Din JN, Archer RM, Harding SA, Sarma J, Lyall K, Flapan AD, Newby DE. Effect of  $\omega$ -3 fatty acid supplementation on endothelial function, endogenous fibrinolysis and platelet activation in male cigarette smokers. *Heart.* 2013; 99:168-74.
18. Din JN, Harding SA, Valerio CJ, Sarma J, Lyall K, Riemersma RA, Newby DE, Flapan AD. Dietary intervention with oil rich fish reduces platelet-monocyte aggregation in man. *Atherosclerosis* 2008;197:290-6.
19. Newby DE, Wright RA, Ludlam CA, Fox KA, Boon NA, Webb DJ. An in vivo model for the assessment of acute fibrinolytic capacity of the endothelium. *Thromb Haemost.* 1997; 78: 1242–1248
20. Tagawa H, Shimokawa H, Tagawa T, Kuroiwa-Matsumoto M, Hirooka Y, Takeshita A. Long-term treatment with eicosapentaenoic acid augments both nitric oxide-mediated and non-nitric oxide-mediated endothelium-dependent forearm vasodilatation in patients with coronary artery disease. *J Cardiovasc Pharmacol.* 1999 Apr;33(4):633-40.

- 1  
2  
3 21. Mori TA, Watts GF, Burke V, Hilme E, Puddey IB, Beilin LJ. Differential effects of eicosapentaenoic  
4 acid and docosahexaenoic acid on vascular reactivity of the forearm microcirculation in  
5 hyperlipidemic, overweight men. *Circulation* 2000;102:1264-9.  
6  
7  
8  
9 22. Chin JP, Gust AP, Nestel PJ, Dart AM. Marine oils dose-dependently inhibit vasoconstriction of  
10 forearm resistance vessels in humans. *Hypertension* 1993;21(1):22-8.  
11  
12  
13 23. Goodfellow J, Bellamy MF, Ramsey MW, Jones CJ, Lewis MJ. Dietary supplementation with  
14 marine omega-3 fatty acids improve systemic large artery endothelial function in subjects with  
15 hypercholesterolemia. *J Am Coll Cardiol.* 2000;35:265-70.  
16  
17  
18  
19 24. McVeigh GE, Brennan GM, Johnston GD, McDermott BJ, McGrath LT, Henry WR, Andrews  
20 JW, Hayes JR. Dietary fish oil augments nitric oxide production or release in patients with type 2  
21 (non-insulin-dependent) diabetes mellitus. *Diabetologia.* 1993;36:33-8.  
22  
23  
24  
25 25. Morgan DR, Dixon LJ, Hanratty CG, El-Sherbeeney N, Hamilton PB, McGrath LT, Leahey WJ,  
26 Johnston GD, McVeigh GE. Effects of dietary omega-3 fatty acid supplementation on  
27 endothelium-dependent vasodilation in patients with chronic heart failure. *Am J Cardiol.*  
28 2006;97:547-51.  
29  
30  
31  
32  
33 26. Woodman RJ, Mori TA, Burke V, Puddey IB, Barden A, Watts GF, Beilin LJ. Effects of purified  
34 eicosapentaenoic acid and docosahexaenoic acid on platelet, fibrinolytic and vascular function in  
35 hypertensive type 2 diabetic patients. *Atherosclerosis* 2003;166:85-93.  
36  
37  
38  
39 27. Wong CY, Yiu KH, Li SW, Lee S, Tam S, Lau CP, Tse HF. Fish-oil supplement has neutral  
40 effects on vascular and metabolic function but improves renal function in patients with Type 2  
41 diabetes mellitus. *Diabet Med* 2010;27:54-60.  
42  
43  
44  
45 28. Skulas-Ray AC, Kris-Etherton PM, Harris WS, Vanden Heuvel JP, Wagner PR, West SG. Dose-  
46 response effects of omega-3 fatty acids on triglycerides, inflammation, and endothelial function in  
47 healthy persons with moderate hypertriglyceridemia. *Am J Clin Nutr.* 2011;93:243-52.  
48  
49  
50  
51 29. Tagawa T, Hirooka Y, Shimokawa H, Hironaga K, Sakai K, Oyama J, Takeshita A. Long-term  
52 treatment with eicosapentaenoic acid improves exercise-induced vasodilation in patients with  
53 coronary artery disease. *Hypertens Res.* 2002;25:823-9.  
54  
55  
56  
57  
58  
59  
60

- 1  
2  
3 30. Haberka M, Mizia-Steć K, Mizia M, Janowska J, Gieszczyk K, Chmiel A, Zahorska-Markiewicz B,  
4  
5 Gašior Z. N-3 polyunsaturated fatty acids early supplementation improves ultrasound indices of  
6  
7 endothelial function, but not through NO inhibitors in patients with acute myocardial infarction: N-3  
8  
9 PUFA supplementation in acute myocardial infarction. *Clin Nutr* 2011;30:79-85.  
10  
11 31. Kristensen SD, Iversen AM, Schmidt EB. n-3 polyunsaturated fatty acids and coronary thrombosis.  
12  
13 *Lipids* 2001;36 Suppl:S79-82.  
14  
15 32. Smith P, Arnesen H, Opstad T, Dahl KH, Eritsland J. Influence of highly concentrated n-3 fatty acids  
16  
17 on serum lipids and hemostatic variables in survivors of myocardial infarction receiving either oral  
18  
19 anticoagulants or matching placebo. *Thromb Res* 1989;53:467-74.  
20  
21 33. Mehta J, Lawson D, Saldeen TJ. Reduction in plasminogen activator inhibitor-1 (PAI-1) with omega-3  
22  
23 polyunsaturated fatty acid (PUFA) intake. *Am Heart J* 1988;116(5 Pt 1):1201-6.  
24  
25 34. Spannagl M, Drummer C, Fröschl H, von Schacky C, Landgraf-Leurs MM, Landgraf R, Schramm W.  
26  
27 Plasmatic factors of haemostasis remain essentially unchanged except for PAI activity during n-3 fatty  
28  
29 acid intake in type I diabetes mellitus. *Blood Coagul Fibrinolysis*. 1991;2:259-65.  
30  
31 35. Finnegan YE, Howarth D, Minihane AM, Kew S, Miller GJ, Calder PC, Williams CM. Plant and  
32  
33 marine derived (n-3) polyunsaturated fatty acids do not affect blood coagulation and fibrinolytic  
34  
35 factors in moderately hyperlipidemic humans. *J Nutr* 2003;133:2210-3.  
36  
37 36. Hellsten G, Boman K, Saarem K, Hallmans G, Nilsson TK. Effects on fibrinolytic activity of corn oil  
38  
39 and a fish oil preparation enriched with omega-3-polyunsaturated fatty acids in a long-term study. *Curr*  
40  
41 *Med Res Opin*. 1993;13:133-9.  
42  
43 37. Toft I, Bønaa KH, Ingebretsen OC, Nordøy A, Jenssen T. Fibrinolytic function after dietary  
44  
45 supplementation with omega3 polyunsaturated fatty acids. *Arterioscler Thromb Vasc Biol*.  
46  
47 1997;17:814-9.  
48  
49 38. Hrafnkelsdóttir T, Gudnason T, Wall U, Jern C, Jern S. Regulation of local availability of active tissue-  
50  
51 type plasminogen activator in vivo in man. *J Thromb Haemost* 2004; 2: 1960–8.  
52  
53 39. Robinson SD, Ludlam CA, Boon NA, Newby DE. Endothelial fibrinolytic capacity predicts future  
54  
55 adverse cardiovascular events in patients with coronary heart disease. *Arterioscler Thromb Vasc Biol*  
56  
57 2007; 27: 1651–6.  
58  
59  
60

- 1  
2  
3 40. Treasure CB, Klein JL, Weintraub WS, Talley JD, Stillabower ME, Kosinski AS, Zhang J, Boccuzzi  
4 SJ, Cedarholm JC, Alexander RW. Beneficial effects of cholesterol-lowering therapy on the coronary  
5 endothelium in patients with coronary artery disease. *N Engl J Med* 1995; 332:481–7.  
6  
7  
8  
9 41. Mancini GB, Henry GC, Macaya C, O'Neill BJ, Pucillo AL, Carere RG, Wargovich TJ, Mudra H,  
10 Lüscher TF, Klibaner MI, Haber HE, Uprichard AC, Pepine CJ, Pitt B. Angiotensin-converting enzyme  
11 inhibition with quinapril improves endothelial vasomotor dysfunction in patients with coronary artery  
12 disease: the TREND (Trial on Reversing ENdothelial Dysfunction) study. *Circulation* 1996; 94: 258–  
13 65.  
14  
15  
16  
17  
18  
19 42. Rauch B, Schiele R, Schneider S, Diller F, Victor N, Gohlke H, Gottwik M, Steinbeck G, Del Castillo  
20 U, Sack R, Worth H, Katus H, Spitzer W, Sabin G, Senges J; OMEGA Study Group. OMEGA, a  
21 randomized, placebo-controlled trial to test the effect of highly purified omega-3 fatty acids on top of  
22 modern guideline-adjusted therapy after myocardial infarction. *Circulation*. 2010; 122(21):2152-9  
23  
24  
25  
26  
27 43. Galan P, Kesse-Guyot E, Czernichow S, Briancon S, Blacher J, Hercberg S; SU.FOL.OM3  
28 Collaborative Group. Effects of B vitamins and omega 3 fatty acids on cardiovascular diseases: a  
29 randomised placebo controlled trial. *BMJ*. 2010 Nov 29;341:c6273  
30  
31  
32  
33 44. Kromhout D, Giltay EJ, Geleijnse JM; Alpha Omega Trial Group. n-3 fatty acids and cardiovascular  
34 events after myocardial infarction. *N Engl J Med*. 2010; 363:2015-26.  
35  
36  
37 45. Newby DE, Witherow FN, Wright RA, Bloomfield P, Ludlam CA, Boon NA, Fox KA, Webb DJ.  
38 Hypercholesterolaemia and lipid lowering treatment do not affect the acute endogenous fibrinolytic  
39 capacity in vivo. *Heart* 2002; 87: 48 –53.  
40  
41  
42  
43 46. Witherow FN, Dawson P, Ludlam CA, Fox KA, Newby DE. Marked bradykinin-induced tissue  
44 plasminogen activator release in patients with heart failure maintained on long-term angiotensin-  
45 converting enzyme inhibitor therapy. *J Am Coll Cardiol*. 2002; 40: 961-6.  
46  
47  
48  
49 47. Aarsetoy H, Brugger-Andersen T, Hetland O, Grundt H, Nilsen DW. Long term influence of regular  
50 intake of high dose n-3 fatty acids on CD40-ligand, pregnancy-associated plasma protein A and matrix  
51 metalloproteinase-9 following acute myocardial infarction. *Thromb Haemost* 2006;95:329-36.  
52  
53  
54  
55  
56  
57  
58  
59  
60

## Acknowledgements

We are grateful to the Clinical Research Facility at the Royal Infirmary of Edinburgh.

## Authorship

- 1) Conception and design or analysis and interpretation of data: JD, KL, SH, JS, AF, DN
- 2) Drafting of the manuscript or revising it critically for intellectual content: JD, JS, AF, DN
- 3) Final approval of the manuscript submitted: All authors.

## Figure Legends

~~Figure 1. Percentage omega-3 fatty acids in plasma phospholipids at baseline, during omega-3 fatty acid supplementation and placebo. Statistical analyses were performed using one way ANOVA with repeated measures and Bonferroni's post-tests for multiple comparisons. EPA, eicosapentaenoic acid; DHA, docosahexaenoic acid.~~

**Figure 1.** Effect of omega-3 fatty acid supplementation on absolute forearm blood flow in response to endothelium-dependent and endothelium-independent vasodilators. Statistical analyses two-way ANOVA and Bonferroni's post-tests for multiple comparisons.

**Figure 2.** Net release of plasma t-PA activity with omega-3 fatty acid supplementation and placebo. Statistical analyses two-way ANOVA and Bonferroni's post-tests for multiple comparisons.

**TABLE 1. Baseline Characteristics**

|                                                       |         |
|-------------------------------------------------------|---------|
| Age, years                                            | 53±3    |
| Body mass index, kg/m <sup>2</sup>                    | 28±1    |
| Systolic blood pressure, mm Hg                        | 137±5   |
| Diastolic blood pressure, mm Hg                       | 78±3    |
| Heart rate, beats per minute                          | 60±2    |
| Total cholesterol, mmol/L                             | 4.2±0.2 |
| LDL cholesterol, mmol/L                               | 2.3±0.2 |
| HDL cholesterol, mmol/L                               | 1.1±0.1 |
| Chol:HDL chol ratio                                   | 3.8±0.2 |
| Triacylglycerol, mmol/L                               | 1.6±0.2 |
| Fasting glucose, mmol/l                               | 5.4±0.1 |
| Time from MI, months                                  | 16±4    |
| Revascularization post-MI, %                          | 56%     |
| Current or ex-smoker, %                               | 61%     |
| Hypertension, %                                       | 11%     |
| Diabetes mellitus, %                                  | 0%      |
| Hyperlipidemia, %                                     | 78%     |
| Family history of premature coronary heart disease, % | 33%     |
| Medical therapy                                       |         |
| Aspirin, %                                            | 100%    |
| Clopidogrel, %                                        | 11%     |
| ACE-inhibitor/Angiotensin-receptor blocker, %         | 56%     |
| Beta-blocker %                                        | 78%     |
| Statin, %                                             | 100%    |

Mean±SEM.

**TABLE 2. Effect of omega-3 fatty acid supplementation on plasma phospholipid fatty acid composition**

|                            | Baseline | Omega-3  | Placebo  | <i>P</i> value   |
|----------------------------|----------|----------|----------|------------------|
| Eicosapentaenoic acid, EPA | 2.0±0.2  | 3.7±0.4  | 1.7±0.1  | <i>P</i> <0.0001 |
| Docosahexaenoic acid, DHA  | 4.8±0.3  | 5.6±0.2  | 4.4±0.3  | <i>P</i> <0.0001 |
| Alpha-linolenic acid       | 0.3±0.01 | 0.3±0.02 | 0.3±0.03 | 0.3              |
| Arachidonic acid           | 12.5±0.4 | 11.0±0.3 | 11.6±0.5 | 0.0005           |
| Linoleic acid              | 18.8±0.6 | 19.0±0.6 | 20.0±0.6 | 0.1              |
| Palmitic acid              | 28.2±0.4 | 27.9±0.3 | 28.2±0.3 | 0.6              |
| Stearic acid               | 13.8±0.3 | 14.1±0.2 | 13.9±0.2 | 0.4              |
| Oleic acid                 | 13.3±0.5 | 13.0±0.4 | 13.8±0.5 | 0.1              |

Mean±SEM. Data analysed using 1-way ANOVA. *P* values in the table are for the difference between the three means. *P* values for individual comparisons are below.

EPA: baseline vs omega-3, *P*<0.0001; baseline vs placebo, *P*=NS; omega-3 vs placebo, *P*<0.0001.

DHA: baseline vs omega-3, *P*<0.01; baseline vs placebo, *P*=NS; omega-3 vs placebo, *P*<0.0001.

Arachidonic acid: baseline vs omega-3, *P*<0.001; baseline vs placebo, *P*=0.05; omega-3 vs placebo, *P*=NS.



**TABLE 3. Effect of omega-3 fatty acid supplementation on blood pressure and lipid profile**

|                                 | Baseline | Omega-3 | Placebo | P-value |
|---------------------------------|----------|---------|---------|---------|
| Heart rate, beats per minute    | 60±3     | 60±2    | 60±2    | 0.9     |
| Systolic blood pressure, mm Hg  | 131±4    | 125±4   | 130±4   | 0.2     |
| Diastolic blood pressure, mm Hg | 77±3     | 74±2    | 74±3    | 0.5     |
| Total cholesterol, mmol/L       | 4.3±0.3  | 3.9±0.3 | 4.0±0.2 | 0.1     |
| LDL cholesterol, mmol/L         | 2.5±0.2  | 2.2±0.3 | 2.2±0.1 | 0.2     |
| HDL cholesterol, mmol/L         | 1.1±0.1  | 1.1±0.1 | 1.1±0.1 | 0.4     |
| Chol:HDL chol ratio             | 3.8±0.3  | 3.5±0.3 | 3.5±0.2 | 0.3     |
| Triacylglycerol, mmol/L         | 1.5±0.2  | 1.3±0.1 | 1.5±0.1 | 0.5     |

Mean±SEM. Data analysed using 1-way ANOVA.

**TABLE 3. Effect of omega 3 fatty acid supplementation on plasma t-PA activity concentrations**

| Substance P pmol/min                                                           | Omega-3 fatty acids |            |            |            | Placebo    |            |            |            |
|--------------------------------------------------------------------------------|---------------------|------------|------------|------------|------------|------------|------------|------------|
|                                                                                | 0                   | 2          | 4          | 8          | 0          | 2          | 4          | 8          |
| t-PA activity, IU mL <sup>-1</sup>                                             |                     |            |            |            |            |            |            |            |
| Non-infused arm                                                                | 0.39±0.08           | 0.45±0.09  | 0.54±0.12  | 0.64±0.14  | 0.45±0.07  | 0.52±0.08  | 0.60±0.09  | 0.65±0.11  |
| Infused arm                                                                    | 0.38±0.08           | 0.83±0.16  | 1.12±0.23  | 1.67±0.38  | 0.43±0.07  | 0.78±0.10  | 1.09±0.11  | 1.26±0.15  |
| t-PA antigen, ng mL <sup>-1</sup>                                              |                     |            |            |            |            |            |            |            |
| Non-infused arm                                                                | 11.78±1.29          | 12.01±1.0  | 12.69±1.08 | 12.83±1.49 | 13.45±1.40 | 12.93±1.70 | 13.08±1.80 | 12.37±1.27 |
| Infused arm                                                                    | 11.90±1.45          | 13.98±1.33 | 13.63±1.12 | 14.86±1.40 | 12.55±1.10 | 12.85±1.44 | 13.45±1.35 | 13.97±1.55 |
| PAI-1 activity, ng mL <sup>-1</sup>                                            |                     |            |            |            |            |            |            |            |
| Non-infused arm                                                                | 1.77±0.53           | 1.84±0.43  | 1.80±0.42  | 1.64±0.45  | 1.44±0.29  | 1.38±0.26  | 1.39±0.47  | 1.34±0.44  |
| Infused arm                                                                    | 2.33±0.86           | 2.18±0.61  | 2.21±0.69  | 1.92±0.63  | 1.69±0.46  | 1.64±0.41  | 1.54±0.39  | 1.49±0.39  |
| PAI-1 antigen, ng mL <sup>-1</sup>                                             |                     |            |            |            |            |            |            |            |
| Non-infused arm                                                                | 39.51±9.22          | 40.84±7.08 | 39.99±6.62 | 38.48±5.79 | 45.06±7.09 | 43.33±6.45 | 44.41±6.67 | 44.26±7.03 |
| Infused arm                                                                    | 37.64±8.36          | 38.83±6.25 | 41.71±5.74 | 40.26±7.32 | 48.89±8.25 | 42.65±6.59 | 43.12±6.60 | 40.61±6.46 |
| Net t-PA antigen release<br>ng 100 mL <sup>-1</sup> of tissue mm <sup>-1</sup> | 0.23±0.51           | -0.28±4.7  | 3.92±1.8   | 8.41±2.94  | -0.87±1.1  | -0.84±2.82 | 0.94±4.22  | 8.10±3.67  |

Mean±SEM. Data analysed using 2-way ANOVA.

t-PA activity: Dose response  $P<0.0001$ . Omega-3 fatty acids versus placebo;  $P=0.83$  (infused arm).

t-PA antigen: Dose response  $P=0.7$ . Omega-3 fatty acids versus placebo;  $P=0.60$  (infused arm).

PAI-1 activity: Dose response  $P=0.94$ . Omega-3 fatty acids versus placebo;  $P=0.17$  (infused arm).

PAI-1 antigen: Dose response  $P=0.67$ . Omega-3 fatty acids versus placebo;  $P=0.40$  (infused arm).

Net t-PA antigen: Dose response  $P=0.02$ . Omega-3 fatty acids versus placebo;  $P=0.62$  (infused arm).

**TABLE 5. Effect of omega 3 fatty acid supplementation on platelet-monocyte aggregation and CD40/CD40 ligand system**

|                                              | <b>Baseline</b> | <b>Omega-3</b> | <b>Placebo</b> | <b>P-value</b> |
|----------------------------------------------|-----------------|----------------|----------------|----------------|
| Platelet-monocyte aggregates, %              | 21.2±3.9        | 23.6±4.2       | 23.0±4.1       | 0.7            |
| Platelet-neutrophil aggregates, %            | 4.9±1.0         | 6.7±1.2        | 6.7±1.1        | 0.1            |
| Platelet surface expression of P-selectin, % | 3.9±0.9         | 5.0±1.0        | 4.3±1.0        | 0.3            |
| Platelet surface expression of CD40L, %      | 3.6±0.4         | 3.4±0.3        | 3.4±0.3        | 0.9            |
| Monocyte expression of CD40, %               | 52.5±5.0        | 46.8±3.4       | 47.4±2.5       | 0.5            |

Mean±SEM. Data analysed using 1-way ANOVA.

## CONSORT 2010 Flow Diagram

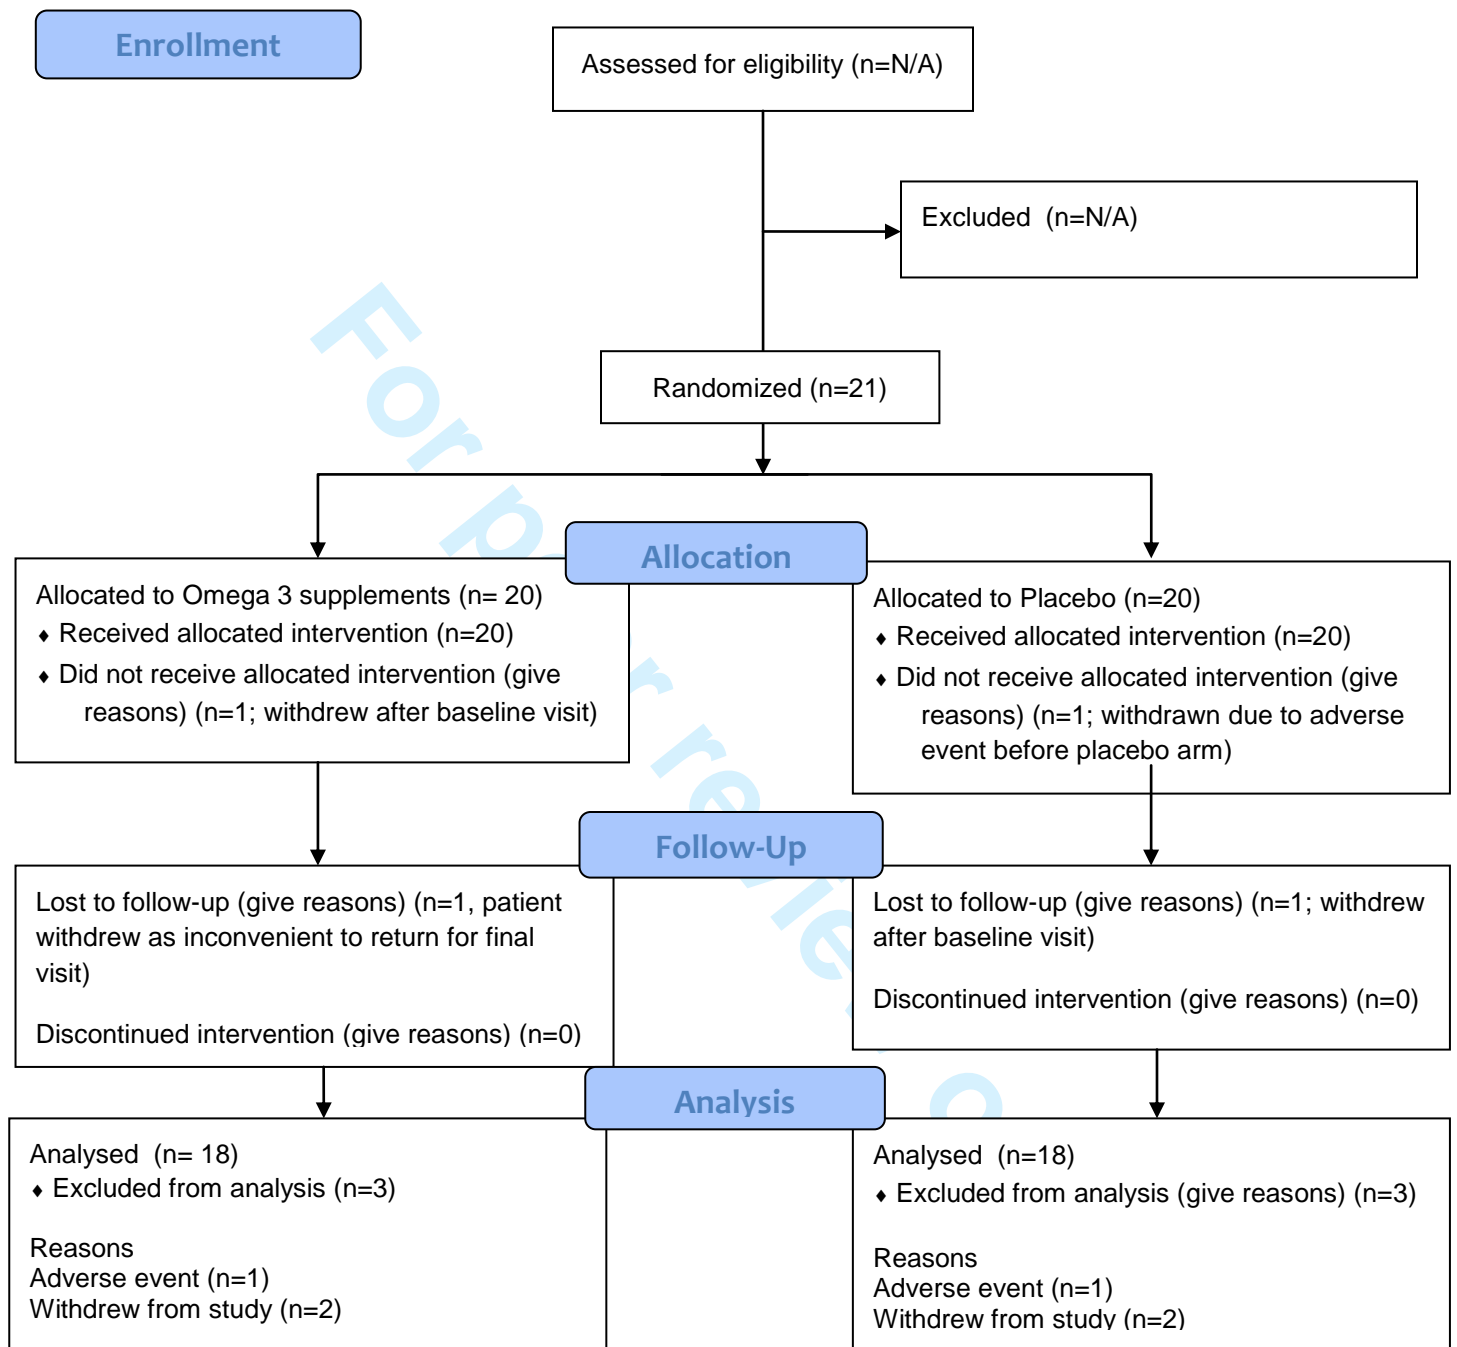

At the time the study was performed, we unfortunately did not record the number of patients screened for eligibility or excluded before randomization for our vascular function studies. Generally, around 30% of patients approached agreed to participate in the invasive venous plethysmography studies.

Three patients were not included in the final analysis. One patient complained of chest pain when he arrived for his second visit (after completing the omega-3 intervention arm) and was admitted with suspected unstable angina. He underwent coronary intervention and made an uncomplicated recovery. An adverse event was logged and the patient withdrawn from the study. The event was reviewed by the Chief Investigator and Independent Advisor and felt unlikely to be related to the omega-3 supplements. Two patients withdrew from the study because they found returning for subsequent visits inconvenient.

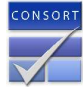

## CONSORT 2010 checklist of information to include when reporting a randomised trial\*

| Section/Topic                    | Item No | Checklist item                                                                                                                                                                              | Reported on page No |
|----------------------------------|---------|---------------------------------------------------------------------------------------------------------------------------------------------------------------------------------------------|---------------------|
| <b>Title and abstract</b>        |         |                                                                                                                                                                                             |                     |
|                                  | 1a      | Identification as a randomised trial in the title                                                                                                                                           | Page 1              |
|                                  | 1b      | Structured summary of trial design, methods, results, and conclusions (for specific guidance see CONSORT for abstracts)                                                                     | Page 2              |
| <b>Introduction</b>              |         |                                                                                                                                                                                             |                     |
| Background and objectives        | 2a      | Scientific background and explanation of rationale                                                                                                                                          | Page 5-6            |
|                                  | 2b      | Specific objectives or hypotheses                                                                                                                                                           | Page 6              |
| <b>Methods</b>                   |         |                                                                                                                                                                                             |                     |
| Trial design                     | 3a      | Description of trial design (such as parallel, factorial) including allocation ratio                                                                                                        | Page 7              |
|                                  | 3b      | Important changes to methods after trial commencement (such as eligibility criteria), with reasons                                                                                          | None                |
| Participants                     | 4a      | Eligibility criteria for participants                                                                                                                                                       | Page 7              |
|                                  | 4b      | Settings and locations where the data were collected                                                                                                                                        | Page 9              |
| Interventions                    | 5       | The interventions for each group with sufficient details to allow replication, including how and when they were actually administered                                                       | Page 7-11           |
| Outcomes                         | 6a      | Completely defined pre-specified primary and secondary outcome measures, including how and when they were assessed                                                                          | Page 7-11           |
|                                  | 6b      | Any changes to trial outcomes after the trial commenced, with reasons                                                                                                                       | None                |
| Sample size                      | 7a      | How sample size was determined                                                                                                                                                              | Page 11             |
|                                  | 7b      | When applicable, explanation of any interim analyses and stopping guidelines                                                                                                                | None                |
| Randomisation:                   |         |                                                                                                                                                                                             |                     |
| Sequence generation              | 8a      | Method used to generate the random allocation sequence                                                                                                                                      | Page 7              |
|                                  | 8b      | Type of randomisation; details of any restriction (such as blocking and block size)                                                                                                         | Page 7              |
| Allocation concealment mechanism | 9       | Mechanism used to implement the random allocation sequence (such as sequentially numbered containers), describing any steps taken to conceal the sequence until interventions were assigned | Page 7              |
| Implementation                   | 10      | Who generated the random allocation sequence, who enrolled participants, and who assigned participants to interventions                                                                     | Page 7              |
| Blinding                         | 11a     | If done, who was blinded after assignment to interventions (for example, participants, care providers, those                                                                                | Page 7              |

|    |                          |                                                                                                                     |                     |
|----|--------------------------|---------------------------------------------------------------------------------------------------------------------|---------------------|
| 1  |                          |                                                                                                                     |                     |
| 2  |                          | assessing outcomes) and how                                                                                         |                     |
| 3  |                          |                                                                                                                     |                     |
| 4  |                          | 11b If relevant, description of the similarity of interventions                                                     | Not applicable      |
| 5  | Statistical methods      | 12a Statistical methods used to compare groups for primary and secondary outcomes                                   | Page 11             |
| 6  |                          | 12b Methods for additional analyses, such as subgroup analyses and adjusted analyses                                | Page 11             |
| 7  |                          |                                                                                                                     |                     |
| 8  | <b>Results</b>           |                                                                                                                     |                     |
| 9  | Participant flow (a      | 13a For each group, the numbers of participants who were randomly assigned, received intended treatment, and        | Supplementary file  |
| 10 | diagram is strongly      | were analysed for the primary outcome                                                                               |                     |
| 11 | recommended)             | 13b For each group, losses and exclusions after randomisation, together with reasons                                | Supplementary file  |
| 12 | Recruitment              | 14a Dates defining the periods of recruitment and follow-up                                                         | Page 7              |
| 13 |                          | 14b Why the trial ended or was stopped                                                                              | Page 7              |
| 14 |                          |                                                                                                                     |                     |
| 15 | Baseline data            | 15 A table showing baseline demographic and clinical characteristics for each group                                 | Page 24             |
| 16 | Numbers analysed         | 16 For each group, number of participants (denominator) included in each analysis and whether the analysis was      | Supplementary file  |
| 17 |                          | by original assigned groups                                                                                         |                     |
| 18 |                          |                                                                                                                     |                     |
| 19 | Outcomes and             | 17a For each primary and secondary outcome, results for each group, and the estimated effect size and its           | Page 12-13          |
| 20 | estimation               | precision (such as 95% confidence interval)                                                                         |                     |
| 21 |                          | 17b For binary outcomes, presentation of both absolute and relative effect sizes is recommended                     | Not applicable      |
| 22 | Ancillary analyses       | 18 Results of any other analyses performed, including subgroup analyses and adjusted analyses, distinguishing       | Page 12-13          |
| 23 |                          | pre-specified from exploratory                                                                                      |                     |
| 24 |                          |                                                                                                                     |                     |
| 25 | Harms                    | 19 All important harms or unintended effects in each group (for specific guidance see CONSORT for harms)            | Supplementary file  |
| 26 |                          |                                                                                                                     |                     |
| 27 | <b>Discussion</b>        |                                                                                                                     |                     |
| 28 | Limitations              | 20 Trial limitations, addressing sources of potential bias, imprecision, and, if relevant, multiplicity of analyses | Page 16             |
| 29 | Generalisability         | 21 Generalisability (external validity, applicability) of the trial findings                                        | Page 16             |
| 30 | Interpretation           | 22 Interpretation consistent with results, balancing benefits and harms, and considering other relevant evidence    | Page 14-16          |
| 31 |                          |                                                                                                                     |                     |
| 32 | <b>Other information</b> |                                                                                                                     |                     |
| 33 | Registration             | 23 Registration number and name of trial registry                                                                   | Clinical Trials.gov |
| 34 | Protocol                 | 24 Where the full trial protocol can be accessed, if available                                                      | Clinical Trials.gov |
| 35 | Funding                  | 25 Sources of funding and other support (such as supply of drugs), role of funders                                  | Page 4              |
| 36 |                          |                                                                                                                     |                     |

\*We strongly recommend reading this statement in conjunction with the CONSORT 2010 Explanation and Elaboration for important clarifications on all the items. If relevant, we also recommend reading CONSORT extensions for cluster randomised trials, non-inferiority and equivalence trials, non-pharmacological treatments, herbal interventions, and pragmatic trials. Additional extensions are forthcoming: for those and for up to date references relevant to this checklist, see [www.consort-statement.org](http://www.consort-statement.org).
